# Supplementary material for: Sedimentation rate and organic matter dynamics shape microbiomes across a continental margin
Source: Copernicus journal article supplement (doi:10.5194/bg-18-5203-2021), 2021-09-23
Supplement: Supplementary file 1 [file bg-18-5203-2021-supplement.zip]

Archive with 3 entries (3 files):
- 1_Supplementary_Information.pdf
- 2_Supplementary_Dataset.xls
- bg-18-5203-2021-supplement-title-page.pdf
