# Supplementary material for: Sedimentation rate and organic matter dynamics shape microbiomes across a continental margin
Source: Copernicus journal article supplement (doi:10.5194/bg-18-5203-2021), 2021-09-23
Supplement: Supplementary file 1 [file bg-18-5203-2021-supplement.zip › 1_Supplementary_Information.pdf]

## Table of Contents

### Supplementary Tables

**Tables S1-S3.** Sediment-depths explored along SSK42/5, SSK42/6 and SSK42/9, respectively, for microbiological analyses, including those based on duplicate metagenome sequencing (run accession numbers given).

**Table S4.** Composition of the genomic sequence database curated for anaerobically methane-oxidizing archaea (ANME), and used in BlastX-based mapping of metagenomic reads and Bowtie2-based mapping of metatranscriptomic reads.

**Table S5.** Composition of the genomic sequence database curated for sulfate-reducing bacteria and archaea, and used in Bowtie2-based mapping of metatranscriptomic reads.

**Table S6.** Composition of the genomic sequence database curated for methanogenic archaea, and used in Bowtie2-based mapping of metatranscriptomic reads.

**Table S7.** Composition of the genomic sequence database curated for acetogenic bacteria, and used in Bowtie2-based mapping of metatranscriptomic reads.

**Table S8.** Composition of the genomic sequence database curated for anaerobic sulfur-oxidizing bacteria (ANSOB), and used in Bowtie2-based mapping of metatranscriptomic reads.

**Table S9.** Spearman correlation coefficients ( $\rho$ ) and corresponding probability ( $P$ ) values determined between the relative abundances of individual phyla/classes and sediment-depth, in the three cores SSK42/5, SSK42/6 and SSK42/9.

**Table S10.** Calculation of diversity indices for the individual sediment-samples of SSK42/5 using the phylum-level classification of their metagenomic data. Since this Table is more than one page long it has been provided as an Excel sheet named Table S10, within the Excel Workbook named Supplementary Dataset.

**Table S11.** Calculation of diversity indices for the individual sediment-samples of SSK42/6 using the phylum-level classification of their metagenomic data. Since this Table is more than one page long it has been provided as an Excel sheet named Table S11, within the Excel Workbook named Supplementary Dataset.

**Table S12.** Calculation of diversity indices for the individual sediment-samples of SSK42/9 using the phylum-level classification of their metagenomic data. Since this Table is more than one page long it has been provided as an Excel sheet named Table S12, within the Excel Workbook named Supplementary Dataset.

**Table S13.** Spearman correlation coefficients ( $\rho$ ) and corresponding probability ( $P$ ) values determined between the individual diversity indices and sediment-depth, in the three cores SSK42/5, SSK42/6 and SSK42/9.

**Table S14.** Number of homologs identified for the various structural genes associated with sulfate reduction, within the metagenome assemblies obtained for the individual sediment-samples of SSK42/5 and SSK42/6. Since this Table is more than one page long it has been provided as an Excel sheet named Table S14, within the Excel Workbook named Supplementary Dataset.

**Table S15.** Number of homologs identified for the various structural genes associated with methanogenesis, within the metagenome assemblies obtained for the individual sediment-samples of SSK42/5 and SSK42/6. Since this Table is more than one page long it has been provided as an Excel sheet named Table S15, within the Excel Workbook named Supplementary Dataset.

**Table S16.** Number of homologs identified for the various structural genes associated with acetogenesis, within the metagenome assemblies obtained for the individual sediment-samples of SSK42/5 and SSK42/6. Since this Table is more than one page long it has been provided as an Excel sheet named Table S16, within the Excel Workbook named Supplementary Dataset.

**Table S17.** Number of homologs identified for the various structural genes associated with anaerobic sulfur oxidation, within the metagenome assemblies obtained for the individual sediment-samples of SSK42/5 and SSK42/6. Since this Table is more than one page long it has been provided as an Excel sheet named Table S17, within the Excel Workbook named Supplementary Dataset.

**Table S18.** Number of homologs identified for the various structural genes associated with sulfate reduction, within the metagenome assemblies obtained for the individual sediment-samples of SSK42/9. Since this Table is more than one page long it has been provided as an Excel sheet named Table S18, within the Excel Workbook named Supplementary Dataset.

**Table S19.** Number of homologs identified for the various structural genes associated with methanogenesis, within the metagenome assemblies obtained for the individual sediment-samples of SSK42/9. Since this Table is more than one page long it has been provided as an Excel sheet named Table S19, within the Excel Workbook named Supplementary Dataset.

**Table S20.** Number of homologs identified for the various structural genes associated with acetogenesis, within the metagenome assemblies obtained for the individual sediment-samples of SSK42/9. Since this Table is more than one page long it has been provided as an Excel sheet named Table S20, within the Excel Workbook named Supplementary Dataset.

**Table S21.** Number of homologs identified for the various structural genes associated with anaerobic sulfur oxidation, within the metagenome assemblies obtained for the individual sediment-samples of SSK42/9. Since this Table is more than one page long it has been provided as an Excel sheet named Table S21, within the Excel Workbook named Supplementary Dataset.

**Table S22.** Total number of functional gene homologs identified for the different anaerobic metabolisms, within the metagenome assemblies obtained for the individual sediment-samples of SSK42/5, SSK42/6 and SSK42/9.

**Table S23.** Spearman correlation coefficients ( $\rho$ ) and corresponding probability ( $P$ ) values determined between the relative abundances of individual metabolic-types and sediment-depth, in the three cores SSK42/5, SSK42/6 and SSK42/9.

**Table S24.** Spearman correlation coefficients ( $\rho$ ) and corresponding probability ( $P$ ) values determined pair-wise between the relative abundances of different metabolic-types, in the three cores SSK42/5, SSK42/6 and SSK42/9.

**Table S25.** Spearman correlation coefficients ( $\rho$ ) and corresponding probability ( $P$ ) values calculated pair-wise between the relative abundances of individual sulfur-metabolizing types, concentrations of different sulfur species and sediment-depth, in the three cores SSK42/5, SSK42/6 and SSK42/9.

**Table S26.** Number of homologs identified for the various structural genes associated with sulfate reduction, within the contigs assembled from the metatranscriptomic sequence data obtained for 0 cmbsf of SSK42/5 and 2 cmbsf of SSK42/6. Since this Table is more than one page long it has been provided as an Excel sheet named Table S26, within the Excel Workbook named Supplementary Dataset.

**Table S27.** Number of homologs identified for the various structural genes associated with methanogenesis, within the contigs assembled from the metatranscriptomic sequence data obtained for 0 cmbsf of SSK42/5 and 2 cmbsf of SSK42/6. Since this Table is more than one page long it has been

provided as an Excel sheet named Table S27, within the Excel Workbook named Supplementary Dataset.

**Table S28.** Number of homologs identified for the various structural genes associated with acetogenesis, within the contigs assembled from the metatranscriptomic sequence data obtained for 0 cmbsf of SSK42/5 and 2 cmbsf of SSK42/6. Since this Table is more than one page long it has been provided as an Excel sheet named Table S28, within the Excel Workbook named Supplementary Dataset.

**Table S29.** Number of homologs identified for the various structural genes associated with anaerobic sulfur oxidation, within the contigs assembled from the metatranscriptomic sequence data obtained for 0 cmbsf of SSK42/5 and 2 cmbsf of SSK42/6. Since this Table is more than one page long it has been provided as an Excel sheet named Table S29, within the Excel Workbook named Supplementary Dataset.

**Table S30.** Aerobic methanotrophy-/methylophony-related genes identified within the contigs assembled from the metatranscriptomic sequence data obtained for the 0 cmbsf and 2 cmbsf sediment-samples of SSK42/5 and SSK42/6 respectively.

**Tables S31 and S32.** Sulfate-reducing genera that were found to be most abundant along SSK42/5 and SSK42/6, respectively, according to the taxonomic classification of metagenomic reads (only those entities which had  $\geq 5\%$  relative abundance among all sulfate-reducing genera identified in a given sediment-sample have been included).

**Tables S33 and S34.** Methanogenic genera that were found to be most abundant along SSK42/5 and SSK42/6, respectively, according to the taxonomic classification of metagenomic reads (only those entities which had  $\geq 5\%$  relative abundance among all methane-producing genera identified in a given sediment-sample have been included).

## References used in the Supplementary Tables

### Supplementary Notes

**Supplementary Note 1.** Referred citations for the sulfate-reducing bacterial and archaeal taxa, summing up the mean relative abundances of which gave the measure of prevalence of sulfate-reducers within a sediment community of SSK42/5, SSK42/6 or SSK42/9.

**Supplementary Note 2.** Referred citations for the anaerobically sulfur-oxidizing chemolithotrophic bacteria (ANSOB), summing up the mean relative abundances of which gave the measure of prevalence of ANSOB within a sediment community of SSK42/5, SSK42/6 or SSK42/9.

**Supplementary Note 3.** Mathematical definitions (fitting to approximate functions) of the fluctuation trends recorded for the relative abundances of the individual metabolic-types along the different sediment cores. This supplementary note includes a figure titled as Fig. S1.

## Supplementary Tables

**Table S1.** Sediment-depths explored along SSK42/5 for microbiological analyses, including those based on duplicate metagenome sequencing (run accession numbers given).

| Sediment-depths explored (in cmbsf) | BioSample accession number | Sample-replicate | Run accession number |
|-------------------------------------|----------------------------|------------------|----------------------|
| 0                                   | SAMN04442175               | 1st replicate    | SRR3646127           |
|                                     |                            | 2nd replicate    | SRR3646128           |
| 15                                  | SAMN04442176               | 1st replicate    | SRR3646129           |
|                                     |                            | 2nd replicate    | SRR3646130           |
| 45                                  | SAMN04442177               | 1st replicate    | SRR3646131           |
|                                     |                            | 2nd replicate    | SRR3646132           |
| 60                                  | SAMN04442178               | 1st replicate    | SRR3646144           |
|                                     |                            | 2nd replicate    | SRR3646145           |
| 90                                  | SAMN04442179               | 1st replicate    | SRR3646147           |
|                                     |                            | 2nd replicate    | SRR3646148           |
| 120                                 | SAMN04442180               | 1st replicate    | SRR3646150           |
|                                     |                            | 2nd replicate    | SRR3646151           |
| 140                                 | SAMN04442181               | 1st replicate    | SRR3646152           |
|                                     |                            | 2nd replicate    | SRR3646153           |
| 160                                 | SAMN04442182               | 1st replicate    | SRR3646155           |
|                                     |                            | 2nd replicate    | SRR3646156           |
| 190                                 | SAMN04442183               | 1st replicate    | SRR3646157           |
|                                     |                            | 2nd replicate    | SRR3646158           |
| 220                                 | SAMN04442184               | 1st replicate    | SRR3646160           |
|                                     |                            | 2nd replicate    | SRR3646161           |
| 260                                 | SAMN04442185               | 1st replicate    | SRR3646162           |
|                                     |                            | 2nd replicate    | SRR3646163           |
| 295                                 | SAMN04442186               | 1st replicate    | SRR3646164           |
|                                     |                            | 2nd replicate    | SRR3646165           |

**Table S2.** Sediment-depths explored along SSK42/6 for microbiological analyses, including those based on duplicate metagenome sequencing (run accession numbers given).

| Sediment-depths explored (in cmbsf) | BioSample accession number | Sample-fraction | Run accession number |
|-------------------------------------|----------------------------|-----------------|----------------------|
| 2                                   | SAMN04442187               | 1st replicate   | SRR3570036           |
|                                     |                            | 2nd replicate   | SRR3570038           |
| 30                                  | SAMN04442189               | 1st replicate   | SRR3577067           |
|                                     |                            | 2nd replicate   | SRR3577068           |
| 45                                  | SAMN04442190               | 1st replicate   | SRR3577070           |
|                                     |                            | 2nd replicate   | SRR3577071           |
| 60                                  | SAMN04442191               | 1st replicate   | SRR3577073           |
|                                     |                            | 2nd replicate   | SRR3577076           |
| 75                                  | SAMN04442192               | 1st replicate   | SRR3577078           |
|                                     |                            | 2nd replicate   | SRR3577079           |
| 90                                  | SAMN04442193               | 1st replicate   | SRR3577081           |
|                                     |                            | 2nd replicate   | SRR3577082           |
| 120                                 | SAMN04442195               | 1st replicate   | SRR3577086           |
|                                     |                            | 2nd replicate   | SRR3577087           |
| 135                                 | SAMN04442196               | 1st replicate   | SRR3577090           |
|                                     |                            | 2nd replicate   | SRR3577311           |
| 175                                 | SAMN04442199               | 1st replicate   | SRR3577337           |
|                                     |                            | 2nd replicate   | SRR3577338           |
| 220                                 | SAMN04442202               | 1st replicate   | SRR3577341           |
|                                     |                            | 2nd replicate   | SRR3577343           |
| 250                                 | SAMN04442204               | 1st replicate   | SRR3577344           |
|                                     |                            | 2nd replicate   | SRR3577345           |
| 265                                 | SAMN04442205               | 1st replicate   | SRR3577347           |
|                                     |                            | 2nd replicate   | SRR3577349           |
| 275                                 | SAMN04442207               | 1st replicate   | SRR3577350           |
|                                     |                            | 2nd replicate   | SRR3577351           |

**Table S3.** Sediment-depths explored along SSK42/9 for microbiological analyses, including those based on duplicate metagenome sequencing (run accession numbers given).

| Sediment-depths explored (in cmbsf) | BioSample accession number | Sample-fraction | Run accession number |
|-------------------------------------|----------------------------|-----------------|----------------------|
| 0                                   | SAMN04442233               | 1st replicate   | SRR3872933           |
|                                     |                            | 2nd replicate   | SRR3872934           |
| 19                                  | SAMN04442236               | 1st replicate   | SRR3884351           |
|                                     |                            | 2nd replicate   | SRR3884355           |
| 50                                  | SAMN04442238               | 1st replicate   | SRR3884357           |
|                                     |                            | 2nd replicate   | SRR3884359           |
| 115                                 | SAMN04442241               | 1st replicate   | SRR3884468           |
|                                     |                            | 2nd replicate   | SRR3884472           |
| 125                                 | SAMN04442242               | 1st replicate   | SRR3884479           |
|                                     |                            | 2nd replicate   | SRR3884488           |
| 145                                 | SAMN04442244               | 1st replicate   | SRR3884538           |
|                                     |                            | 2nd replicate   | SRR3884540           |
| 155                                 | SAMN04442245               | 1st replicate   | SRR3884542           |
|                                     |                            | 2nd replicate   | SRR3884544           |
| 180                                 | SAMN04442246               | 1st replicate   | SRR3884546           |
|                                     |                            | 2nd replicate   | SRR3884547           |
| 225                                 | SAMN04442248               | 1st replicate   | SRR3884548           |
|                                     |                            | 2nd replicate   | SRR3884552           |
| 255                                 | SAMN04442250               | 1st replicate   | SRR3884553           |
|                                     |                            | 2nd replicate   | SRR3884554           |

**Table S4.** Composition of the genomic sequence database curated for anaerobically methane-oxidizing archaea (ANME), and used in BlastX-based mapping of metagenomic reads and Bowtie2-based mapping of metatranscriptomic reads.

| Serial number | Name of the uncultivated ANME entity included   | Strain identity       | GenBank accession number of the genome / fosmid sequence | Nucleotide length | Number of putative proteins present |
|---------------|-------------------------------------------------|-----------------------|----------------------------------------------------------|-------------------|-------------------------------------|
| 1.            | <i>Candidatus</i> Methanoperedens nitroreducens | ANME-2d               | NZ_JMIY000000000                                         | 3,197,389         | 3,254                               |
| 2.            | <i>Candidatus</i> Methanoperedens nitroreducens | Mnv1                  | NZ_FZMP000000000                                         | 3,524,740         | 3,494                               |
| 3.            | Unclassified Methanophagales                    | ANME1a ex4572_4       | NJEM000000000.1                                          | 1,018,085         | 1,136                               |
| 4.            | Methanosarcinales archaeon UBA203               | ANME-2c UBA203        | DASC000000000.1                                          | 2,390,467         | 2,640                               |
| 5.            | Methanosarcinales archaeon UBA261               | ANME-2c UBA261        | DAWR000000000.1                                          | 2,368,347         | 2,581                               |
| 6.            | ANME-2 cluster archaeon HR1                     | ANME-2 HR1            | MZXQ000000000.1                                          | 2,195,459         | 2,460                               |
| 7.            | Methanomicrobiales archaeon                     | ANME-1 M5.MMPM        | QEXZ000000000.1                                          | 1,898,925         | 2,352                               |
| 8.            | Methanophagales archaeon                        | ANME1a G37ANME1       | PQXB000000000.1                                          | 1,398,999         | 1,394                               |
| 9.            | Methanophagales archaeon                        | G60ANME1              | PQXC000000000.1                                          | 1,805,851         | 1,870                               |
| 10.           | ANME-2 cluster archaeon                         | E20ANME2              | PQXF000000000.1                                          | 3,609,340         | 3,903                               |
| 11.           | ANME-2 cluster archaeon                         | ANME2 S7142MS2        | PYCL000000000.2                                          | 1,633,070         | 1,931                               |
| 12.           | Methanophagales archaeon                        | ANME1 CONS3730B06UFb1 | QENH000000000.1                                          | 3,182,512         | 3,476                               |
| 13.           | ANME-2 cluster archaeon                         | ANME2c WYZ-LMO14      | PIXW000000000.1                                          | 1,670,603         | 2,036                               |
| 14.           | Methanophagales archaeon                        | ANME1 WYZ-LMO13       | PIXU000000000.1                                          | 1,934,883         | 2,240                               |
| 15.           | Methanosarcinales archaeon                      | ANME2c B131_G9        | QMVM000000000.1                                          | 2,253,386         | 2,574                               |
| 16.           | Methanosarcinales archaeon                      | ANME1 B64_G16         | QMVO000000000.1                                          | 2,212,588         | 2,785                               |
| 17.           | Methanosarcinales archaeon                      | ANME1 B39_G2          | QMVQ000000000.1                                          | 1,690,640         | 1,954                               |
| 18.           | Methanosarcinales archaeon                      | ANME-2c-GOS           | RXIK000000000.1                                          | 2,656,101         | 2,811                               |
| 19.           | Methanophagales archaeon                        | ANME-1-THS            | RXIE000000000.1                                          | 2,030,246         | 2,351                               |

|     |                         |                              |                |           |       |
|-----|-------------------------|------------------------------|----------------|-----------|-------|
| 20. | ANME-2 cluster archaeon | ANME2<br>das_tool.concoct.12 | SPBG00000000.1 | 2,460,684 | 2,974 |
| 21. | ANME-2 cluster archaeon | CONS3730D10UFb2              | QYBA00000000.1 | 1,417,276 | 1,599 |
| 22. | Uncultured archaeon     | clone GZfos10C7              | AY714814       | 36,996    | -     |
| 23. | Uncultured archaeon     | clone GZfos11H11             | AY714816       | 36,155    | -     |
| 24. | Uncultured archaeon     | clone GZfos12E1              | AY714817       | 35,297    | -     |
| 25. | Uncultured archaeon     | clone GZfos13E1              | AY714819       | 35,492    | -     |
| 26. | Uncultured archaeon     | clone GZfos17A3              | AY714821       | 37,604    | -     |
| 27. | Uncultured archaeon     | clone GZfos18B6              | AY714825       | 37,726    | -     |
| 28. | Uncultured archaeon     | clone GZfos18C8              | AY714826       | 39,495    | -     |
| 29. | Uncultured archaeon     | clone GZfos19C7              | AY714830       | 33,603    | -     |
| 30. | Uncultured archaeon     | clone GZfos1C11              | AY714832       | 42,079    | -     |
| 31. | Uncultured archaeon     | clone GZfos24D9              | AY714837       | 29,650    | -     |
| 32. | Uncultured archaeon     | clone GZfos25D1              | AY714838       | 31,125    | -     |
| 33. | Uncultured archaeon     | clone GZfos26B2              | AY714839       | 25,119    | -     |
| 34. | Uncultured archaeon     | clone GZfos26E7              | AY714841       | 32,690    | -     |
| 35. | Uncultured archaeon     | clone GZfos27G5              | AY714848       | 40,522    | -     |
| 36. | Uncultured archaeon     | clone GZfos30H9              | AY714852       | 36,779    | -     |
| 37. | Uncultured archaeon     | clone GZfos33H6              | AY714858       | 34,700    | -     |
| 38. | Uncultured archaeon     | clone GZfos34G5              | AY714860       | 34,480    | -     |
| 39. | Uncultured archaeon     | clone GZfos35D7              | AY714865       | 25,161    | -     |
| 40. | Uncultured archaeon     | clone GZfos9C4               | AY714870       | 38,084    | -     |

**Table S5.** Composition of the genomic sequence database curated for sulfate-reducing bacteria and archaea, and used in Bowtie2-based mapping of metatranscriptomic reads.

| Serial number | Genera <sup>1</sup> included in the curated database | Strain whose genome sequence was included in the database | GenBank accession number of the genome sequence included in the database | Genome size (in bp) | Number of CDS present in the genome |
|---------------|------------------------------------------------------|-----------------------------------------------------------|--------------------------------------------------------------------------|---------------------|-------------------------------------|
| 1.            | <i>Archaeoglobus fulgidus</i>                        | DSM 4304                                                  | NC_000917,<br>NZ_AE000943-<br>NZ_AE001114                                | 2,178,400           | 2,369                               |
| 2.            | <i>Desulfacinum infernum</i>                         | DSM 9756                                                  | NZ_FQVB00000000                                                          | 4,239,813           | 3,584                               |
| 3.            | <i>Desulfarculus baarsii</i>                         | DSM 2075                                                  | NC_014365                                                                | 3,655,731           | 3,244                               |
| 4.            | <i>Desulfatibacillum aliphaticivorans</i>            | DSM 15576                                                 | NZ_AUCT01000000                                                          | 6,466,399           | 5,264                               |
| 5.            | <i>Desulfatiglans anilini</i>                        | DSM 4660                                                  | NZ_AULM01000000                                                          | 4,664,663           | 3,943                               |
| 6.            | <i>Desulfatirhabdium butyrivorans</i>                | DSM 18734                                                 | NZ_AUCU01000000                                                          | 4,475,774           | 3,852                               |
| 7.            | <i>Desulfatitalea tepidiphila</i>                    | S28bF                                                     | NZ_BCAG01000000                                                          | 5,614,477           | 4,858                               |
| 8.            | <i>Desulfitibacter alkalitolerans</i>                | DSM 16504                                                 | NZ_JHVU01000000                                                          | 4,341,391           | 4,096                               |
| 9.            | <i>Desulfitobacterium dehalogenans</i>               | ATCC 51507                                                | NC_018017,<br>NZ_AGJH01000000,NZ_<br>AGJH01000001-<br>NZ_AGJH01000066    | 4,321,753           | 3,974                               |
| 10.           | <i>Desulfobacca acetoxidans</i>                      | DSM 11109                                                 | NC_015388                                                                | 3,282,536           | 2,888                               |
| 11.           | <i>Desulfobacter postgatei</i>                       | 2ac9                                                      | NZ_AGJR02000000                                                          | 3,972,458           | 3,485                               |
| 12.           | <i>Desulfobacterium autotrophicum</i> <sup>2</sup>   | HRM2                                                      | NC_012108                                                                | 5,589,073           | 4,835                               |

|     |                                                                             |            |                                                                        |           |       |
|-----|-----------------------------------------------------------------------------|------------|------------------------------------------------------------------------|-----------|-------|
| 13. | <i>Desulfobacterium vacuolatum</i> <sup>2</sup>                             | DSM 3385   | NZ_FWXY00000000                                                        | 5,035,353 | 4,050 |
| 14. | <i>Desulfobacula toluolica</i>                                              | Tol2       | NC_018645                                                              | 5,197,905 | 4,545 |
| 15. | <i>Desulfobulbus propionicus</i>                                            | DSM 2032   | CP002364                                                               | 3,851,869 | 3,283 |
| 16. | <i>Desulfocapsa sulfexigens</i> <sup>3</sup>                                | DSM 10523  | NC_020304                                                              | 3,986,761 | 3,522 |
| 17. | <i>Desulfocarbo indianensis</i>                                             | SCBM       | NZ_LBMP00000000                                                        | 5,114,003 | 4,383 |
| 18. | <i>Desulfococcus multivorans</i>                                            | DSM 2059   | NZ_CP015381                                                            | 4,455,399 | 3,813 |
| 19. | <i>Desulfocurvus vexinensis</i>                                             | DSM 17965  | NZ_JAEX00000000                                                        | 3,623,604 | 3,200 |
| 20. | <i>Desulfofaba hansenii</i> <sup>4</sup>                                    | P1         | NZ_PESK00000000                                                        | 6,710,842 | 5,239 |
| 21. | <i>Desulfofustis glycolicus</i>                                             | DS 9705    | NZ_FQXS00000000                                                        | 4,975,017 | 4,297 |
| 22. | <i>Desulfohalobium retbaense</i>                                            | DSM 5692   | NC_013223,<br>NZ_ABTO01000000,NZ_<br>ABTO01000001-<br>NZ_ABTO01000032  | 2,864,304 | 2,488 |
| 23. | <i>Desulfoluna spongiiphila</i> <sup>5</sup>                                | AA1        | NZ_FMUX00000000                                                        | 6,530,021 | 5,203 |
| 24. | <i>Desulfomicrobium baculatum</i>                                           | DSM 4028   | NC_013173,<br>NZ_ABTP01000000,NZ_<br>ABTP01000001-<br>NZ_ABTP01000013  | 3,942,657 | 3,395 |
| 25. | <i>Desulfomonile tiedjei</i>                                                | DSM 6799   | NC_018025                                                              | 6,500,104 | 5,551 |
| 26. | <i>Desulfonatronospira thiodismutans</i>                                    | ASO3-1     | NZ_ACJN00000000                                                        | 4,107,394 | 3,729 |
| 27. | <i>Desulfonatrovibrio hydrogenovorans</i>                                   | DSM 9292   | NZ_JMKT00000000                                                        | 2,939,095 | 2,761 |
| 28. | <i>Desulfonatrum lacustre</i>                                               | DSM 10312  | NZ_JAFE00000000                                                        | 3,761,151 | 3,303 |
| 29. | <i>Desulfonauticus submarinus</i>                                           | DSM 15269  | NZ_FNIN00000000                                                        | 2,100,696 | 2,014 |
| 30. | <i>Desulfonispora thiosulfatigenes</i>                                      | DSM 11270  | NZ_FWWT00000000                                                        | 2,412,168 | 2,345 |
| 31. | <i>Desulfopila aestuarii</i>                                                | DSM 18488  | NZ_FRFE00000000                                                        | 6,065,581 | 5,073 |
| 32. | <i>Desulfoplanes formicivorans</i>                                          | Pf12B      | NZ_BDFE00000000                                                        | 3,000,887 | 2,628 |
| 33. | <i>Desulforegula conservatrix</i>                                           | Mb1Pa      | NZ_AUEY00000000                                                        | 4,464,516 | 3,803 |
| 34. | <i>Desulforhopalus singaporensis</i> <sup>6</sup>                           | DSM 12130  | NZ_FNJI00000000                                                        | 5,006,845 | 4,203 |
| 35. | <i>Desulfosarcina cetonica</i> <sup>7</sup>                                 | JCM 12296  | NZ_BBCC00000000                                                        | 7,092,334 | 5,582 |
| 36. | <i>Desulfospira joergensenii</i>                                            | DSM 10085  | NZ_ATUG00000000                                                        | 6,119,470 | 5,490 |
| 37. | <i>Desulfosporosinus orientis</i>                                           | DSM 765    | NC_016584                                                              | 5,863,081 | 5,229 |
| 38. | <i>Desulfotalea psychrophila</i>                                            | LSv54      | NC_006138                                                              | 3,523,383 | 3,128 |
| 39. | <i>Desulfothermus okinawensis</i> <sup>8</sup>                              | JCM 13304  | BBBM00000000                                                           | 2,774,183 | ND    |
| 40. | <i>Desulfotignum balticum</i>                                               | DSM 7044   | NZ_ATWO00000000                                                        | 5,118,755 | 4,623 |
| 41. | <i>Desulfotomaculum nigrificans</i>                                         | CO-1-SRB   | NC_015565                                                              | 2,892,255 | 2,647 |
| 42. | <i>Desulfovermiculus halophilus</i>                                         | DSM 18834  | NZ_JIAK00000000                                                        | 3,241,624 | 2,903 |
| 43. | <i>Desulfovibrio desulfuricans</i> subsp. <i>Desulfuricans</i> <sup>9</sup> | ATCC 27774 | NC_011883,<br>NZ_ACCT01000000,NZ_<br>ACCT01000001-<br>NZ_ACCT01000010  | 2,873,437 | 2,406 |
| 44. | <i>Desulfovibrio desulfuricans</i> <sup>9</sup>                             | ND132      | NC_016803,<br>NZ_AEUJ01000000,NZ_<br>AEUJ01000001-<br>NZ_AEUJ01000007, | 3,858,580 | 3,423 |

|     |                                                 |           |                                                                        |           |       |
|-----|-------------------------------------------------|-----------|------------------------------------------------------------------------|-----------|-------|
|     |                                                 |           | NZ_CM001077                                                            |           |       |
| 45. | <i>Desulfovirgula thermocuniculi</i>            | DSM 16036 | NZ_AUBR00000000                                                        | 3,054,371 | 3,031 |
| 46. | <i>Desulfurella acetivorans</i>                 | A63       | NZ_CP007051                                                            | 1,816,487 | 1,814 |
| 47. | <i>Desulfurispirillum indicum</i> <sup>10</sup> | S5        | NC_014836,<br>NZ_ADGU01000000,NZ_ADGU01000001-<br>NZ_ADGU01000113      | 2,928,377 | 2,576 |
| 48. | <i>Desulfurispora thermophila</i>               | DSM 16022 | NZ_AQWN00000000                                                        | 2,821,579 | 2,661 |
| 49. | <i>Desulfurivibrio alkaliphilus</i>             | AHT2      | NC_014216,<br>NZ_ACYL01000000,<br>NZ_ACYL01000001,-<br>NZ_ACYL01000066 | 3,097,763 | 2,643 |
| 50. | <i>Desulfurobacterium thermolithotrophum</i>    | DSM 11699 | NC_015185                                                              | 1,541,968 | 1,508 |
| 51. | <i>Desulfurococcus mucosus</i>                  | DSM 2162  | NC_014961                                                              | 1,314,639 | 1,345 |
| 52. | <i>Desulfuromonas acetoxidans</i>               | DSM 684   | NZ_AAEW00000000                                                        | 3,828,328 | 3,241 |
| 53. | <i>Desulfuromusa kysingii</i>                   | DSM 7343  | NZ_FNQN00000000                                                        | 3,742,394 | 3,300 |
| 54. | <i>Dethiobacter alkaliphilus</i>                | AHT 1     | NZ_ACJM00000000                                                        | 3,116,746 | 3,067 |
| 55. | <i>Dethiosulfatibacter aminovorans</i>          | DSM 17477 | NZ_FQZL00000000                                                        | 4,031,536 | 3,531 |
| 56. | <i>Dethiosulfovibrio peptidovorans</i>          | DSM 11002 | NZ_ABTR00000000                                                        | 2,576,359 | 2,399 |
| 57. | <i>Thermodesulfatator indicus</i>               | DSM 15286 | NC_015681                                                              | 2,322,224 | 2,226 |
| 58. | <i>Thermodesulfobacterium commune</i>           | DSM 2178  | NZ_CP008796                                                            | 1,764,045 | 1,702 |
| 59. | <i>Thermodesulfobium narugense</i>              | DSM 14796 | NC_015499                                                              | 1,898,865 | 1,825 |
| 60. | <i>Thermodesulforhabdus norvegica</i>           | DSM 9990  | NZ_FOUU00000000                                                        | 2,801,945 | 2,631 |

<sup>1</sup> All these genera have sulfur reduction reported from its members.

<sup>2</sup> *Desulfobacterium* contain 9 species; the type species is *Desulfobacterium indolicum* but its genome sequence is not available so all the genome sequences available for different species of *Desulfobacterium* was included in this database.

<sup>3</sup> *Desulfocapsa* contains two species: the type species is *Desulfocapsa thiozymogenes*; but its genome sequence is not available; so the sequence of *D. sulfexigens* DSM10523 was included in this database.

<sup>4</sup> *Desulfofaba* contains three species: the type species is *Desulfofaba gelida*; but its genome sequence is not available. The only available genome sequence from this genera is the genome sequence of *D. hansenii* P1, so it is included in this database.

<sup>5</sup> *Desulfoluna* contains two species: the type species is *Desulfoluna butyratoxydans*; but its genome sequence is not available; so the sequence of *D. spongiiphila* AA1 was included in this database.

<sup>6</sup> *Desulforhopalus* contains two species: the type species is *Desulforhopalus vacuolatus*; but its genome sequence is not available; so the sequence of *D. singaporensis* DSM12130 was included in this database.

<sup>7</sup> *Desulfosarcina* contains five species: the type species is *Desulfosarcina variabilis*; but its genome sequence is not available. The only available genome sequence from this genera is the genome sequence of *D. cetonica* JCM 12296, so it is included in this database.

<sup>8</sup> *Desulfothermus* contains two species: the type species is *Desulfothermus naphthae*; but its genome sequence is not available; so the sequence of *D. okinawensis* JCM 13304 was included in this database.

<sup>9</sup> The type species of *Desulfovibrio* is *Desulfovibrio desulfuricans*. Genome sequence is available for two strains of *D. desulfuricans*, both the sequence was included in this database.

<sup>10</sup> *Desulfurispirillum* contains two species: the type species is *Desulfurispirillum alkaliphilum*; but its genome sequence is not available; so the sequence of *D. indicum* S5 was included in this database.

**Table S6.** Composition of the genomic sequence database curated for methanogenic archaea, and used in Bowtie2-based mapping of metatranscriptomic reads.

| Serial number | Genera <sup>1</sup> included in the curated database | Strain whose genome sequence was included in the database | GenBank accession number of the genome sequence included in the database                                                                                          | Genome size (in bp) | Number of CDS present in the genome |
|---------------|------------------------------------------------------|-----------------------------------------------------------|-------------------------------------------------------------------------------------------------------------------------------------------------------------------|---------------------|-------------------------------------|
| 1.            | <i>Methanobacterium formicicum</i>                   | DSM 3637                                                  | NZ_AMPO000000000                                                                                                                                                  | 2,684,267           | 2,476                               |
| 2.            | <i>Methanobrevibacter ruminantium</i>                | M1                                                        | NC_013790                                                                                                                                                         | 2,937,203           | 2,143                               |
| 3.            | <i>Methanocaldococcus jannaschii</i>                 | DSM 2661                                                  | NC_000909<br>NZ_U67459-NZ_U67608                                                                                                                                  | 1,664,970           | 1,762                               |
| 4.            | <i>Methanocella paludicola</i>                       | SANAE                                                     | AP011532                                                                                                                                                          | 2,957,635           | 3,004                               |
| 5.            | <i>Methanococcoides methylutens</i> <sup>2</sup>     | DSM 2657                                                  | NZ_JRHO000000000                                                                                                                                                  | 2,508,511           | 2,355                               |
| 6.            | <i>Methanococcoides methylutens</i> <sup>2</sup>     | MM1                                                       | NZ_CP009518                                                                                                                                                       | 2,394,636           | 2,245                               |
| 7.            | <i>Methanocorpusculum parvum</i>                     | XII                                                       | NZ_LMVO000000000                                                                                                                                                  | 1,709,133           | 1,688                               |
| 8.            | <i>Methanoculleus bourgensis</i>                     | MS2T                                                      | NC_018227                                                                                                                                                         | 2,789,774           | 2,538                               |
| 9.            | <i>Methanofollis ethanolicus</i> <sup>3</sup>        | HASU                                                      | NZ_BCNW000000000                                                                                                                                                  | 2,713,913           | 2,554                               |
| 10.           | <i>Methanofollis liminatans</i> <sup>3</sup>         | DSM 4140                                                  | NZ_CM001555<br>NZ_AGCO01000000                                                                                                                                    | 2,475,100           | 2,396                               |
| 11.           | <i>Methanogenium cariaci</i>                         | JCM 10550                                                 | NZ_BBBG000000000                                                                                                                                                  | 2,686,643           | 2,258                               |
| 12.           | <i>Methanohalobium evestigatum</i>                   | Z-7303                                                    | NC_014253                                                                                                                                                         | 2,242,317           | 2,267                               |
| 13.           | <i>Methanohalophilus mahii</i>                       | DSM 5219                                                  | NC_014002                                                                                                                                                         | 2,012,424           | 1,955                               |
| 14.           | <i>Methanolacinia paynteri</i>                       | DSM 2545                                                  | NZ_AXDV000000000                                                                                                                                                  | 2,785,552           | 2,664                               |
| 15.           | <i>Methanolinea tarda</i>                            | NOBI-1                                                    | NZ_AGIY02000001<br>NZ_AGIY000000000                                                                                                                               | 2,052,856           | 2,010                               |
| 16.           | <i>Methanolobus tindarius</i>                        | DSM 2278                                                  | NZ_AZAJ000000000                                                                                                                                                  | 3,151,883           | 2,886                               |
| 17.           | <i>Methanomassiliicoccus luminyensis</i>             | B10                                                       | NZ_CAJE000000000                                                                                                                                                  | 2,620,233           | 2,555                               |
| 18.           | <i>Methanomethylovorans hollandica</i>               | DSM 15978                                                 | NC_019977                                                                                                                                                         | 2,428,904           | 2,525                               |
| 19.           | <i>Methanomicrobium mobile</i>                       | BP                                                        | NZ_JOMF000000000                                                                                                                                                  | 1,711,791           | 1,617                               |
| 20.           | <i>Methanoplanus limicola</i>                        | DSM 2279                                                  | NZ_CM001436<br>NZ_AHKP01000000                                                                                                                                    | 3,200,946           | 2,967                               |
| 21.           | <i>Methanopyrus kandleri</i>                         | AV19                                                      | AE009439 AE010302-<br>AE010458                                                                                                                                    | 1,694,969           | 1,687                               |
| 22.           | <i>Methanoregula boonei</i>                          | 6A8                                                       | NC_009712                                                                                                                                                         | 2,542,943           | 2,513                               |
| 23.           | <i>Methanosalsum zhilinae</i>                        | DSM 4017                                                  | NC_015676                                                                                                                                                         | 2,138,444           | 1,955                               |
| 24.           | <i>Methanosarcina acetivorans</i> <sup>4</sup>       | C2A                                                       | NC_003552<br>NZ_AE010656-<br>NZ_AE011189                                                                                                                          | 5,751,492           | 4,567                               |
| 25.           | <i>Methanosarcina barkeri</i> <sup>†</sup>           | MS                                                        | NZ_CP009528                                                                                                                                                       | 4,533,209           | 3,481                               |
| 26.           | <i>Methanosarcina barkeri</i> <sup>†</sup>           | 3                                                         | NZ_CP009517                                                                                                                                                       | 4,560,446           | 3,589                               |
| 27.           | <i>Methanosarcina flavescens</i> <sup>4</sup>        | E03.2                                                     | NZ_LKAZ000000000                                                                                                                                                  | 3,268,085           | 2,652                               |
| 28.           | <i>Methanosarcina horonobensis</i> <sup>4</sup>      | HB-1                                                      | NZ_CP009516                                                                                                                                                       | 5,018,607           | 4,144                               |
| 29.           | <i>Methanosarcina lacustris</i> <sup>4</sup>         | Z-7289                                                    | NZ_CP009515                                                                                                                                                       | 4,139,808           | 3,264                               |
| 30.           | <i>Methanosarcina mazei</i> <sup>†</sup>             | S-6                                                       | NZ_CP009512                                                                                                                                                       | 4,142,816           | 3,359                               |
| 31.           | <i>Methanosarcina sicilae</i> <sup>4</sup>           | T4/M                                                      | NZ_CP009506                                                                                                                                                       | 5,017,558           | 3,930                               |
| 32.           | <i>Methanosarcina soligelid</i> <sup>†</sup>         | SMA-21                                                    | NZ_JQLR000000000                                                                                                                                                  | 4,064,496           | 3,257                               |
| 33.           | <i>Methanosarcina spela</i> <sup>†</sup>             | MC-15                                                     | NZ_LMVP000000000                                                                                                                                                  | 5,088,600           | 3,774                               |
| 34.           | <i>Methanosarcina thermophila</i> <sup>4</sup>       | TM-1                                                      | NZ_CP009501                                                                                                                                                       | 3,127,379           | 2,597                               |
| 35.           | <i>Methanosarcina vacuolata</i> <sup>4</sup>         | Z-761                                                     | NZ_CP009520                                                                                                                                                       | 4,505,752           | 3,538                               |
| 36.           | <i>Methanosphaera stadtmanae</i>                     | DSM 3091                                                  | NC_007681                                                                                                                                                         | 1,767,403           | 1,518                               |
| 37.           | <i>Methanosphaerula palustris</i>                    | E1-9c                                                     | NC_011832<br>NZ_ABZB01000000<br>NZ_ABZB01000001<br>NZ_ABZB01000002<br>NZ_ABZB01000003<br>NZ_ABZB01000004<br>NZ_ABZB01000005<br>NZ_ABZB01000006<br>NZ_ABZB01000007 | 2,922,917           | 2,696                               |

|     |                                                 |           |                                                                     |           |       |
|-----|-------------------------------------------------|-----------|---------------------------------------------------------------------|-----------|-------|
| 38. | <i>Methanospirillum hungatei</i>                | JF-1      | NC_007796<br>NZ_AALU01000000<br>NZ_AALU01000001-<br>NZ_AALU01000090 | 3,544,738 | 3,294 |
| 39. | <i>Methanothermobacter thermautotrophicus</i>   | Delta H   | NC_000916<br>NZ_AE000795-<br>NZ_AE000942                            | 1,751,377 | 1,756 |
| 40. | <i>Methanothermococcus thermolithotrophicus</i> | DSM 2095  | NZ_AQXV00000000                                                     | 1,686,930 | 1,624 |
| 41. | <i>Methanothermus fervidus</i>                  | DSM 2088  | NC_014658                                                           | 1,243,342 | 1,296 |
| 42. | <i>Methanosaeta concilii</i>                    | GP-6      | NC_015416                                                           | 3,008,626 | 2,899 |
| 43. | <i>Methanotorris igneus</i>                     | Kol 5     | NC_015562                                                           | 1,854,197 | 1,751 |
| 44. | <i>Methermicoccus shengliensis</i>              | DSM 18856 | NZ_JONQ00000000                                                     | 1,511,083 | 1,558 |

<sup>1</sup> All these genera have methanogenesis reported from its members.

<sup>2</sup> Type strain of *Methanococcoides methylutens* is DSM 2657. Genome sequence of *Methanococcoides methylutens* MM1 was also available. So both the genome sequences were included.

<sup>3</sup> *Methanofollis* contain 5 species; the type species is *Methanofollis tationis* but its genome sequence is not available so all the genome sequences available for different species of *Methanofollis* was included in this database.

<sup>4</sup> *Methanosarcina* contain 16 species; the type species is *Methanosarcina methanica* but its genome sequence is not available so all the genome sequences available for different species of *Methanosarcina* was included in this database.

**Table S7.** Composition of the genomic sequence database curated for acetogenic bacteria, and used in Bowtie2-based mapping of metatranscriptomic reads.

| Serial number | Genera <sup>1</sup> included in the curated database | Strain whose genome sequence was included in the database | GenBank accession number of the genome sequence included in the database | Genome size (in bp) | Number of CDS present in the genome |
|---------------|------------------------------------------------------|-----------------------------------------------------------|--------------------------------------------------------------------------|---------------------|-------------------------------------|
| 1.            | <i>Acetitomaculum ruminis</i>                        | DSM 5522                                                  | NZ_FOJY00000000                                                          | 3,078,669           | 2,537                               |
| 2.            | <i>Acetoanaerobium noterae</i>                       | ATCC 35199                                                | NZ_FUYN00000000                                                          | 2,811,216           | 2,663                               |
| 3.            | <i>Acetobacterium woodii</i>                         | DSM 1030                                                  | NC_016894                                                                | 4,044,777           | 3,527                               |
| 4.            | <i>Acetohalobium arabaticum</i>                      | DSM 5501                                                  | NC_014378                                                                | 2,469,596           | 2,274                               |
| 5.            | <i>Acetonema longum</i>                              | DSM 6540                                                  | NZ_AFGF00000000                                                          | 4,323,011           | 3,847                               |
| 6.            | <i>Moorella thermoacetica</i>                        | ATCC 39073                                                | NC_007644                                                                | 2,628,784           | 2,460                               |
| 7.            | <i>Oxobacter pfennigii</i>                           | DSM 3222                                                  | NZ_LKET00000000                                                          | 4,510,552           | 4,146                               |
| 8.            | <i>Ruminococcus flavefaciens</i>                     | ATCC 19208                                                | NZ_JAEF00000000                                                          | 3,581,418           | 2,983                               |
| 9.            | <i>Sporomusa sphaeroides</i>                         | DSM 2875                                                  | NZ_LSLJ00000000                                                          | 4,971,384           | 4,463                               |

<sup>1</sup> All these genera have acetogenesis reported from its members.

**Table S8.** Composition of the genomic sequence database curated for anaerobic sulfur-oxidizing bacteria, and used in Bowtie2-based mapping of metatranscriptomic reads.

| Serial number | Genera <sup>1</sup> included in the curated database | Strain whose genome sequence was included in the database | GenBank accession number of the genome sequence included in the database | Genome size (in bp) | Number of CDS present in the genome |
|---------------|------------------------------------------------------|-----------------------------------------------------------|--------------------------------------------------------------------------|---------------------|-------------------------------------|
| 1.            | <i>Beggiatoa alba</i>                                | B18LD                                                     | NZ_AHMA00000000                                                          | 4,263,346           | 3,446                               |
| 2.            | <i>Sulfuricurvum kujiense</i>                        | DSM16994                                                  | NC_014762                                                                | 2,574,824           | 2,772                               |
| 3.            | <i>Sulfurimonas autotrophica</i>                     | DSM16294                                                  | NC_014506                                                                | 2,153,198           | 2,140                               |
| 4.            | <i>Sulfurovum lithotrophicum</i>                     | ATCCBAA-797                                               | NZ_CP011308                                                              | 2,217,891           | 2,144                               |
| 5.            | <i>Thiobacillus thioparus</i>                        | DSM505                                                    | NZ_ARDU00000000                                                          | 3,200,073           | 3,071                               |

<sup>1</sup> All these genera have anaerobic sulfur oxidation reported from its members.

**Table S9.** Spearman correlation coefficients ( $\rho$ ) and corresponding probability ( $P$ ) values determined between the relative abundances of individual phyla/classes and sediment-depth, in the three cores SSK42/5, SSK42/6 and SSK42/9.

| Phyla                      | SSK42/5 |             | SSK42/6 |           | SSK42/9 |           |
|----------------------------|---------|-------------|---------|-----------|---------|-----------|
|                            | $\rho$  | $P$ value   | $\rho$  | $P$ value | $\rho$  | $P$ value |
| <i>Crenarchaeota</i>       | -0.7    | 0.017305023 | -0.5    | 0.0673418 | 0.7     | 0.0311411 |
| <i>Euryarchaeota</i>       | -0.7    | 0.007353207 | -0.5    | 0.0888743 | 0.7     | 0.0275141 |
| <i>Thaumarchaeota</i>      | -0.6    | 0.027954553 | -0.5    | 0.0673418 | 0.6     | 0.087768  |
| <i>Acidobacteria</i>       | -0.9    | 0.000192153 | -0.7    | 0.013897  | -0.4    | 0.2956041 |
| <i>Actinobacteria</i>      | -0.9    | 0           | -0.4    | 0.2166298 | 0.03    | 0.9457098 |
| <i>Bacteroidetes</i>       | -0.6    | 0.0457531   | -0.8    | 0.0016243 | -0.6    | 0.0802151 |
| <i>Chloroflexi</i>         | -0.9    | 0.000597084 | -0.5    | 0.0610936 | 0.9     | 0.0019771 |
| <i>Cyanobacteria</i>       | -0.3    | 0.403976659 | -0.4    | 0.1350282 | 0.2     | 0.4915555 |
| <i>Firmicutes</i>          | -0.6    | 0.040002049 | -0.6    | 0.0448907 | 0.7     | 0.0241946 |
| <i>Planctomycetes</i>      | -0.9    | 0           | -0.7    | 0.0052901 | -0.4    | 0.2180285 |
| <i>Alphaproteobacteria</i> | -0.3    | 0.286690914 | -0.4    | 0.1887717 | -0.2    | 0.4915555 |
| <i>Betaproteobacteria</i>  | 0.6     | 0.03239475  | 0.4     | 0.2166298 | -0.6    | 0.0957916 |
| <i>Deltaproteobacteria</i> | -0.6    | 0.066629001 | -0.5    | 0.0775693 | -0.09   | 0.811417  |
| <i>Gammaproteobacteria</i> | 0.9     | 0           | 0.7     | 0.0120134 | -0.7    | 0.0311411 |
| <i>Zetaproteobacteria</i>  | 0.8     | 0.006596543 | -0.1    | 0.7369512 | -0.6    | 0.0664691 |
| <i>Thermotogae</i>         | -0.8    | 0.004659881 | -0.6    | 0.0340307 | 0.7     | 0.0350915 |
| <i>Verrucomicrobia</i>     | -0.7    | 0.018825126 | -0.4    | 0.1350282 | 0.4     | 0.2956041 |

**Table S13.** Spearman correlation coefficients ( $\rho$ ) and corresponding probability ( $P$ ) values determined between the individual diversity indices and sediment-depth, in the three cores SSK42/5, SSK42/6 and SSK42/9.

|                      | SSK42/5 |           | SSK42/6 |           | SSK42/9 |           |
|----------------------|---------|-----------|---------|-----------|---------|-----------|
|                      | $\rho$  | $P$ value | $\rho$  | $P$ value | $\rho$  | $P$ value |
| <b>D</b>             | 0.8     | 0.0009    | 0.8     | 0.0026    | 0.2     | 0.6       |
| <b>H</b>             | -0.8    | 0.0017    | -0.9    | 0.0001    | -0.07   | 0.9       |
| <b>E<sub>H</sub></b> | -0.8    | 0.0017    | -0.9    | 0.0001    | -0.07   | 0.9       |

**Table S23.** Spearman correlation coefficients ( $\rho$ ) and corresponding probability ( $P$ ) values determined between the relative abundances of individual metabolic-types and sediment-depth, in the three cores SSK42/5, SSK42/6 and SSK42/9.

|                         | SSK42/5 |           | SSK42/6 |           | SSK42/9 |           |
|-------------------------|---------|-----------|---------|-----------|---------|-----------|
|                         | $\rho$  | $P$ value | $\rho$  | $P$ value | $\rho$  | $P$ value |
| <b>Sulfate-reducers</b> | -0.6    | 0.04      | -0.5    | 0.05      | 0.5     | 0.2       |
| <b>Methanogens</b>      | -0.7    | 0.007     | -0.6    | 0.05      | 0.7     | 0.03      |
| <b>ANME</b>             | -0.4    | 0.21      | -0.2    | 0.44      | 1.0     | 1.79E-5   |
| <b>Acetogens</b>        | -0.7    | 0.02      | -0.5    | 0.06      | 0.9     | 0.0005    |

**Table S24.** Spearman correlation coefficients ( $\rho$ ) and corresponding probability ( $P$ ) values determined pair-wise between the relative abundances of different metabolic-types, in the three cores SSK42/5, SSK42/6 and SSK42/9.

|                  | Methanogens | Sulfate-reducers | ANME    | Acetogens | ANSOB  |          |
|------------------|-------------|------------------|---------|-----------|--------|----------|
| SSK42/5          |             |                  |         |           |        |          |
| Methanogens      |             | 0.0029           | 0.0012  | 0.0153    | 0.1825 | P values |
| Sulfate-reducers | 0.7762      |                  | 0.0918  | 0.0625    | 0.1825 |          |
| ANME             | 0.8161      | 0.5079           |         | 0.2072    | 0.9225 |          |
| Acetogens        | 0.6783      | 0.5524           | 0.3923  |           | 0.2453 |          |
| ANSOB            | -0.4125     | -0.4126          | -0.0315 | -0.3636   |        |          |
|                  | ρ values    |                  |         |           |        |          |
| SSK42/6          |             |                  |         |           |        |          |
| Methanogens      |             | 5.90E-5          | 0.0006  | 1.63E-7   | 0.2466 | P values |
| Sulfate-reducers | 0.8846      |                  | 0.0005  | 2.66E-4   | 0.8305 |          |
| ANME             | 0.8226      | 0.8281           |         | 0.0008    | 0.4757 |          |
| Acetogens        | 0.9615      | 0.8461           | 0.8116  |           | 0.1617 |          |
| ANSOB            | -0.3461     | -0.0659          | -0.2173 | -0.4120   |        |          |
|                  | ρ values    |                  |         |           |        |          |
| SSK42/9          |             |                  |         |           |        |          |
| Methanogens      |             | 0.1275           | 0.0417  | 0.0022    | 0.2442 | P values |
| Sulfate-reducers | 0.5151      |                  | 0.2830  | 0.0425    | 0.1869 |          |
| ANME             | 0.6505      | 0.3769           |         | 0.0007    | 0.3177 |          |
| Acetogens        | 0.8424      | 0.6484           | 0.8815  |           | 0.5796 |          |
| ANSOB            | -0.4060     | 0.4545           | -0.3526 | -0.2      |        |          |
|                  | ρ values    |                  |         |           |        |          |

**Table S25.** Spearman correlation coefficients ( $\rho$ ) and corresponding probability ( $P$ ) values calculated pair-wise between the relative abundances of individual sulfur-metabolizing types, concentrations of different sulfur species and sediment-depth, in the three cores SSK42/5, SSK42/6 and SSK42/9.

|                                           | Sediment-depth | Sulfate concentration | Sulfide concentration | Prevalence of sulfate-reducers* | Prevalence of anaerobic sulfur-oxidizers* |          |
|-------------------------------------------|----------------|-----------------------|-----------------------|---------------------------------|-------------------------------------------|----------|
| SSK42/5                                   |                |                       |                       |                                 |                                           |          |
| Sediment-depth                            |                | 6.1834e-06            | 0.2426                | 0.04                            | 0.0348                                    | P values |
| Sulfate concentration                     | -0.9940        |                       | 0.2549                | 0.1096                          | 0.0488                                    |          |
| Sulfide concentration                     | -0.2739        | 0.2671                |                       | 0.6092                          | 0.1369                                    |          |
| Prevalence of sulfate-reducers*           | -0.6           | 0.4895                | 0.1646                |                                 | 0.1825                                    |          |
| Prevalence of anaerobic sulfur-oxidizers* | 0.6224         | -0.5874               | 0.4553                | -0.4126                         |                                           |          |
|                                           | ρ values       |                       |                       |                                 |                                           |          |
| SSK42/6                                   |                |                       |                       |                                 |                                           |          |
| Sediment-depth                            |                | 4.0551e-06            | 3.5630e-06            | 0.05                            | 0.0655                                    | P values |
| Sulfate concentration                     | -0.9974        |                       | 3.4463e-06            | 0.0812                          | 0.0655                                    |          |
| Sulfide concentration                     | 0.8282         | -0.8288               |                       | 0.0183                          | 0.0161                                    |          |
| Prevalence of sulfate-reducers*           | -0.5           | 0.5055                | -0.6538               |                                 | 0.8305                                    |          |
| Prevalence of anaerobic sulfur-oxidizers* | 0.5818         | -0.5818               | 0.7016                | -0.0659                         |                                           |          |
|                                           | ρ values       |                       |                       |                                 |                                           |          |
| SSK42/9                                   |                |                       |                       |                                 |                                           |          |
| Sediment-depth                            |                | 6.0314e-06            | 0.2341                | 0.2                             | 0.4697                                    | P values |
| Sulfate concentration                     | -0.9985        |                       | 0.2367                | 0.1909                          | 0.4697                                    |          |
| Sulfide concentration                     | 0.2782         | -0.2767               |                       | 0.9186                          | 0.2790                                    |          |
| Prevalence of sulfate-reducers*           | 0.5            | -0.4545               | -0.0424               |                                 | 0.1869                                    |          |
| Prevalence of anaerobic sulfur-oxidizers* | -0.2606        | 0.2606                | -0.3818               | 0.4545                          |                                           |          |
|                                           | ρ values       |                       |                       |                                 |                                           |          |

**Table S30.** Aerobic methanotrophy-/methylotrophy-related genes identified within the contigs assembled from the metatranscriptomic sequence data obtained for the 0 cmbsf and 2 cmbsf sediment-samples of SSK42/5 and SSK42/6 respectively.

| Query name                                 | Seed eggNOG ortholog | Organismal source of the closest hit   | Seed ortholog e value | Seed ortholog score | KEGG orthology numbers | COG category | Annotation                                                                               |
|--------------------------------------------|----------------------|----------------------------------------|-----------------------|---------------------|------------------------|--------------|------------------------------------------------------------------------------------------|
| <b>Sediment-sample: 0 cmbsf of SSK42/5</b> |                      |                                        |                       |                     |                        |              |                                                                                          |
| GLALPIAA_04690                             | 443152.MDG893_16537  | <i>Marinobacter algicola</i> DG893     | 9.90E-176             | 621.3               | K16161                 | C            | <i>mmoC</i> ; methane monooxygenase (soluble) component C [EC:1.14.13.25]                |
| <b>Sediment-sample: 2 cmbsf of SSK42/6</b> |                      |                                        |                       |                     |                        |              |                                                                                          |
| PMIPANLO_03980                             | 443152.MDG893_16537  | <i>Marinobacter algicola</i> DG893     | 9.90E-176             | 621.3               | K16161                 | C            | <i>mmoC</i> ; methane monooxygenase (soluble) component C [EC:1.14.13.25]                |
| PMIPANLO_05912                             | 318586.Pden_2993     | <i>Paracoccus denitrificans</i> PD1222 | 1.30E-27              | 126.7               | K14028                 | G            | <i>mdh1</i> , <i>mxaF</i> ; methanol dehydrogenase (cytochrome c) subunit 1 [EC:1.1.2.7] |

**Table S31.** Sulfate-reducing genera that were found to be most abundant along SSK42/5, according to the taxonomic classification of metagenomic reads (only those entities which had  $\geq 5\%$  relative abundance among all sulfate-reducing genera identified in a given sediment-sample have been included).

| Sediment-depths explored (in cmbsf) | Genera identified (Phylum/Class*) | Relative abundance among all sulfate-reducing genera detected in the sample (in %) | Sulfur compounds reduction phenotype(s) known for the genus                                                        | Reference(s)                                |
|-------------------------------------|-----------------------------------|------------------------------------------------------------------------------------|--------------------------------------------------------------------------------------------------------------------|---------------------------------------------|
| 0                                   | <i>Desulfovibrio</i> (Delta)      | 14                                                                                 | Species can reduce $\text{SO}_4$ , $\text{S}_2\text{O}_3$ as well as $\text{S}^0$                                  | (Motamedi and Pedersen, 1998)               |
|                                     | <i>Desulfatibacillum</i> (Delta)  | 12                                                                                 | Species can reduce $\text{SO}_4$ , $\text{SO}_3$ as well as $\text{S}_2\text{O}_3$                                 | (Cravo-Laureau et al., 2004)                |
|                                     | <i>Desulfococcus</i> (Delta)      | 9                                                                                  | Species can reduce $\text{SO}_4$ and $\text{SO}_3$                                                                 | (Platen et al., 1990)                       |
|                                     | <i>Desulfotomaculum</i> (Fmt)     | 9                                                                                  | Some species reduce $\text{S}_2\text{O}_3$ , $\text{SO}_3$ and $\text{S}^0$ while others reduce $\text{SO}_4$      | (Hagenauer et al., 1997; Love et al., 1993) |
|                                     | <i>Archaeoglobus</i> (EuA)        | 8                                                                                  | Species can reduce $\text{SO}_4$ , $\text{SO}_3$ as well as $\text{S}_2\text{O}_3$ but $\text{S}^0$ inhibit growth | (Burggraf et al., 1990)                     |
|                                     | <i>Desulfobacterium</i> (Delta)   | 7                                                                                  | Species can reduce $\text{SO}_4$ , $\text{SO}_3$ as well as $\text{S}_2\text{O}_3$                                 | (Brysch et al., 1987)                       |
|                                     | <i>Desulfitobacterium</i> (Fmt)   | 6                                                                                  | Species can reduce $\text{S}^0$ , $\text{SO}_3$ as well as $\text{S}_2\text{O}_3$                                  | (Utkin et al., 1994)                        |
|                                     | <i>Desulfuromonas</i> (Delta)     | 5                                                                                  | Species can reduce $\text{S}^0$                                                                                    | (An and Picardal, 2015)                     |
| 15                                  | <i>Desulfovibrio</i> (Delta)      | 15                                                                                 | Species can reduce $\text{SO}_4$ , $\text{S}_2\text{O}_3$ as well as $\text{S}^0$                                  | (Motamedi and Pedersen, 1998)               |
|                                     | <i>Desulfatibacillum</i> (Delta)  | 12                                                                                 | Species can reduce $\text{SO}_4$ , $\text{SO}_3$ as well as $\text{S}_2\text{O}_3$                                 | (Cravo-Laureau et al., 2004)                |
|                                     | <i>Desulfococcus</i> (Delta)      | 9                                                                                  | Species can reduce $\text{SO}_4$ and $\text{SO}_3$                                                                 | (Platen et al., 1990)                       |
|                                     | <i>Desulfotomaculum</i> (Fmt)     | 9                                                                                  | Some species reduce $\text{S}_2\text{O}_3$ , $\text{SO}_3$ and $\text{S}^0$ while others reduce $\text{SO}_4$      | (Hagenauer et al. 1997; Love et al., 1993)  |
|                                     | <i>Archaeoglobus</i> (EuA)        | 9                                                                                  | Species can reduce $\text{SO}_4$ , $\text{SO}_3$ as well as $\text{S}_2\text{O}_3$ but $\text{S}^0$ inhibit growth | (Burggraf et al., 1990)                     |
|                                     | <i>Desulfobacterium</i> (Delta)   | 7                                                                                  | Species can reduce $\text{SO}_4$ , $\text{SO}_3$ as well as $\text{S}_2\text{O}_3$                                 | (Brysch et al., 1987)                       |
|                                     | <i>Desulfitobacterium</i> (Fmt)   | 5                                                                                  | Species can reduce $\text{S}^0$ , $\text{SO}_3$ as well as $\text{S}_2\text{O}_3$                                  | (Utkin et al., 1994)                        |
|                                     | <i>Desulfuromonas</i> (Delta)     | 5                                                                                  | Species can reduce $\text{S}^0$                                                                                    | (An and Picardal, 2015)                     |
| 45                                  | <i>Desulfovibrio</i> (Delta)      | 16                                                                                 | Species can reduce $\text{SO}_4$ , $\text{S}_2\text{O}_3$ as well as $\text{S}^0$                                  | (Motamedi and Pedersen, 1998)               |
|                                     | <i>Desulfatibacillum</i> (Delta)  | 10                                                                                 | Species can reduce $\text{SO}_4$ , $\text{SO}_3$ as well as $\text{S}_2\text{O}_3$                                 | (Cravo-Laureau et al., 2004)                |
|                                     | <i>Desulfotomaculum</i> (Fmt)     | 9                                                                                  | Some species reduce $\text{S}_2\text{O}_3$ , $\text{SO}_3$ and $\text{S}^0$ while others reduce $\text{SO}_4$      | (Hagenauer et al., 1997; Love et al., 1993) |
|                                     | <i>Archaeoglobus</i> (EuA)        | 7                                                                                  | Species can reduce $\text{SO}_4$ , $\text{SO}_3$ as well as $\text{S}_2\text{O}_3$ but $\text{S}^0$ inhibit growth | (Burggraf et al., 1990)                     |
|                                     | <i>Desulfococcus</i> (Delta)      | 6                                                                                  | Species can reduce $\text{SO}_4$ and $\text{SO}_3$                                                                 | (Platen et al., 1990)                       |
|                                     | <i>Desulfobacterium</i> (Delta)   | 6                                                                                  | Species can reduce $\text{SO}_4$ , $\text{SO}_3$ as well as $\text{S}_2\text{O}_3$                                 | (Brysch et al., 1987)                       |
|                                     | <i>Desulfitobacterium</i> (Fmt)   | 6                                                                                  | Species can reduce $\text{S}^0$ , $\text{SO}_3$ as well as $\text{S}_2\text{O}_3$                                  | (Utkin et al., 1994)                        |
|                                     | <i>Desulfuromonas</i> (Delta)     | 6                                                                                  | Species can reduce $\text{S}^0$                                                                                    | (An and Picardal, 2015)                     |
|                                     | <i>Desulfotalea</i> (Delta)       | 6                                                                                  | Species can reduce $\text{SO}_4$ , $\text{SO}_3$ as well as $\text{S}_2\text{O}_3$                                 | (Knoblauch et al., 1999)                    |
|                                     | <i>Desulfurivibrio</i> (Delta)    | 6                                                                                  | Species can reduce $\text{S}^0$ , polysulfides & $\text{S}_2\text{O}_3$ but not sulfate                            | (Sorokin et al., 2008)                      |
| 60                                  | <i>Desulfovibrio</i> (Delta)      | 19                                                                                 | Species can reduce $\text{SO}_4$ , $\text{S}_2\text{O}_3$ as well as $\text{S}^0$                                  | (Motamedi and Pedersen, 1998)               |
|                                     | <i>Desulfatibacillum</i> (Delta)  | 10                                                                                 | Species can reduce $\text{SO}_4$ , $\text{SO}_3$ as well as $\text{S}_2\text{O}_3$                                 | (Cravo-Laureau et al., 2004)                |
|                                     | <i>Desulfotomaculum</i> (Fmt)     | 8                                                                                  | Some species reduce $\text{S}_2\text{O}_3$ , $\text{SO}_3$ and $\text{S}^0$ while others reduce $\text{SO}_4$      | (Hagenauer et al., 1997; Love et al., 1993) |
|                                     | <i>Desulfococcus</i> (Delta)      | 7                                                                                  | Species can reduce $\text{SO}_4$ and $\text{SO}_3$                                                                 | (Platen et al., 1990)                       |
|                                     | <i>Desulfobacterium</i> (Delta)   | 6                                                                                  | Species can reduce $\text{SO}_4$ , $\text{SO}_3$ as well as $\text{S}_2\text{O}_3$                                 | (Brysch et al., 1987)                       |
|                                     | <i>Archaeoglobus</i> (EuA)        | 6                                                                                  | Species can reduce $\text{SO}_4$ , $\text{SO}_3$ as well as $\text{S}_2\text{O}_3$ but $\text{S}^0$ inhibit growth | (Burggraf et al., 1990)                     |
|                                     | <i>Desulfuromonas</i> (Delta)     | 6                                                                                  | Species can reduce $\text{S}^0$                                                                                    | (An and Picardal, 2015)                     |
|                                     | <i>Desulfotalea</i> (Delta)       | 5                                                                                  | Species can reduce $\text{SO}_4$ , $\text{SO}_3$ as well as $\text{S}_2\text{O}_3$                                 | (Knoblauch et al., 1999)                    |
|                                     | <i>Desulfitobacterium</i> (Fmt)   | 5                                                                                  | Species can reduce $\text{S}^0$ , $\text{SO}_3$ as well as $\text{S}_2\text{O}_3$                                  | (Utkin et al., 1994)                        |
| 90                                  | <i>Desulfovibrio</i> (Delta)      | 16                                                                                 | Species can reduce $\text{SO}_4$ , $\text{S}_2\text{O}_3$ as well as $\text{S}^0$                                  | (Motamedi and Pedersen, 1998)               |
|                                     | <i>Desulfatibacillum</i> (Delta)  | 10                                                                                 | Species can reduce $\text{SO}_4$ , $\text{SO}_3$ as well as $\text{S}_2\text{O}_3$                                 | (Cravo-Laureau et al., 2004)                |
|                                     | <i>Desulfuromonas</i> (Delta)     | 9                                                                                  | Species can reduce $\text{S}^0$                                                                                    | (An and Picardal, 2015)                     |
|                                     | <i>Desulfotomaculum</i> (Fmt)     | 8                                                                                  | Some species reduce $\text{S}_2\text{O}_3$ , $\text{SO}_3$ and $\text{S}^0$ while others reduce $\text{SO}_4$      | (Hagenauer et al., 1997; Love et al., 1993) |
|                                     | <i>Desulfurivibrio</i> (Delta)    | 7                                                                                  | Species can reduce $\text{S}^0$ , polysulfides & $\text{S}_2\text{O}_3$ but not sulfate                            | (Sorokin et al., 2008)                      |
|                                     | <i>Desulfococcus</i> (Delta)      | 6                                                                                  | Species can reduce $\text{SO}_4$ and $\text{SO}_3$                                                                 | (Platen et al., 1990)                       |
|                                     | <i>Desulfobacterium</i> (Delta)   | 6                                                                                  | Species can reduce $\text{SO}_4$ , $\text{SO}_3$ as well as $\text{S}_2\text{O}_3$                                 | (Brysch et al., 1987)                       |

|     |                                  |    |                                                                                                                                 |                                             |
|-----|----------------------------------|----|---------------------------------------------------------------------------------------------------------------------------------|---------------------------------------------|
|     | <i>Desulfotalea</i> (Delta)      | 6  | Species can reduce SO <sub>4</sub> , SO <sub>3</sub> as well as S <sub>2</sub> O <sub>3</sub>                                   | (Knoblauch et al., 1999)                    |
|     | <i>Archaeoglobus</i> (EuA)       | 5  | Species can reduce SO <sub>4</sub> , SO <sub>3</sub> as well as S <sub>2</sub> O <sub>3</sub> but S <sup>0</sup> inhibit growth | (Burggraf et al., 1990)                     |
| 120 | <i>Desulfovibrio</i> (Delta)     | 20 | Species can reduce SO <sub>4</sub> , S <sub>2</sub> O <sub>3</sub> as well as S <sup>0</sup>                                    | (Motamedi and Pedersen, 1998)               |
|     | <i>Desulfatibacillum</i> (Delta) | 9  | Species can reduce SO <sub>4</sub> , SO <sub>3</sub> as well as S <sub>2</sub> O <sub>3</sub>                                   | (Cravo-Laureau et al., 2004)                |
|     | <i>Desulfuromonas</i> (Delta)    | 8  | Species can reduce S <sup>0</sup>                                                                                               | (An and Picardal, 2015)                     |
|     | <i>Desulfotomaculum</i> (Fmt)    | 8  | Some species reduce S <sub>2</sub> O <sub>3</sub> , SO <sub>3</sub> and S <sup>0</sup> while others reduce SO <sub>4</sub>      | (Hagenauer et al., 1997; Love et al., 1993) |
|     | <i>Desulfococcus</i> (Delta)     | 7  | Species can reduce SO <sub>4</sub> and SO <sub>3</sub>                                                                          | (Platen et al., 1990)                       |
|     | <i>Desulfotalea</i> (Delta)      | 6  | Species can reduce SO <sub>4</sub> , SO <sub>3</sub> as well as S <sub>2</sub> O <sub>3</sub>                                   | (Knoblauch et al., 1999)                    |
|     | <i>Archaeoglobus</i> (EuA)       | 6  | Species can reduce SO <sub>4</sub> , SO <sub>3</sub> as well as S <sub>2</sub> O <sub>3</sub> but S <sup>0</sup> inhibit growth | (Burggraf et al., 1990)                     |
|     | <i>Desulfurivibrio</i> (Delta)   | 6  | Species can reduce S <sup>0</sup> , polysulfides & S <sub>2</sub> O <sub>3</sub> but not sulfate                                | (Sorokin et al., 2008)                      |
|     | <i>Desulfobacterium</i> (Delta)  | 5  | Species can reduce SO <sub>4</sub> , SO <sub>3</sub> as well as S <sub>2</sub> O <sub>3</sub>                                   | (Brysch et al., 1987)                       |
|     |                                  |    |                                                                                                                                 |                                             |
| 140 | <i>Desulfurivibrio</i> (Delta)   | 24 | Species can reduce S <sup>0</sup> , polysulfides & S <sub>2</sub> O <sub>3</sub> but not sulfate                                | (Sorokin et al., 2008)                      |
|     | <i>Desulfotalea</i> (Delta)      | 16 | Species can reduce SO <sub>4</sub> , SO <sub>3</sub> as well as S <sub>2</sub> O <sub>3</sub>                                   | (Knoblauch et al., 1999)                    |
|     | <i>Desulfobulbus</i> (Delta)     | 10 | Species can reduce SO <sub>4</sub> , SO <sub>3</sub> as well as S <sub>2</sub> O <sub>3</sub>                                   | (Suzuki et al., 2007; Sorokin et al., 2012) |
|     | <i>Desulfovibrio</i> (Delta)     | 9  | Species can reduce SO <sub>4</sub> , S <sub>2</sub> O <sub>3</sub> as well as S <sup>0</sup>                                    | (Motamedi and Pedersen, 1998)               |
|     | <i>Desulfatibacillum</i> (Delta) | 6  | Species can reduce SO <sub>4</sub> , SO <sub>3</sub> as well as S <sub>2</sub> O <sub>3</sub>                                   | (Cravo-Laureau et al., 2004)                |
|     | <i>Desulfuromonas</i> (Delta)    | 5  | Species can reduce S <sup>0</sup>                                                                                               | (An and Picardal, 2015)                     |
|     | <i>Desulfotomaculum</i> (Fmt)    | 5  | Some species reduce S <sub>2</sub> O <sub>3</sub> , SO <sub>3</sub> and S <sup>0</sup> while others reduce SO <sub>4</sub>      | (Hagenauer et al., 1997; Love et al., 1993) |
|     | <i>Desulfobacterium</i> (Delta)  | 5  | Species can reduce SO <sub>4</sub> , SO <sub>3</sub> as well as S <sub>2</sub> O <sub>3</sub>                                   | (Brysch et al., 1987)                       |
| 160 | <i>Desulfovibrio</i> (Delta)     | 16 | Species can reduce SO <sub>4</sub> , S <sub>2</sub> O <sub>3</sub> as well as S <sup>0</sup>                                    | (Motamedi and Pedersen, 1998)               |
|     | <i>Desulfuromonas</i> (Delta)    | 13 | Species can reduce S <sup>0</sup>                                                                                               | (An and Picardal, 2015)                     |
|     | <i>Desulfotalea</i> (Delta)      | 10 | Species can reduce SO <sub>4</sub> , SO <sub>3</sub> as well as S <sub>2</sub> O <sub>3</sub>                                   | (Knoblauch et al., 1999)                    |
|     | <i>Desulfurivibrio</i> (Delta)   | 9  | Species can reduce S <sup>0</sup> , polysulfides & S <sub>2</sub> O <sub>3</sub> but not sulfate                                | (Sorokin et al., 2008)                      |
|     | <i>Desulfatibacillum</i> (Delta) | 8  | Species can reduce SO <sub>4</sub> , SO <sub>3</sub> as well as S <sub>2</sub> O <sub>3</sub>                                   | (Cravo-Laureau et al., 2004)                |
|     | <i>Desulfobacterium</i> (Delta)  | 6  | Species can reduce SO <sub>4</sub> , SO <sub>3</sub> as well as S <sub>2</sub> O <sub>3</sub>                                   | (Brysch et al., 1987)                       |
|     | <i>Desulfococcus</i> (Delta)     | 6  | Species can reduce SO <sub>4</sub> and SO <sub>3</sub>                                                                          | (Platen et al., 1990)                       |
|     | <i>Desulfobulbus</i> (Delta)     | 5  | Species can reduce SO <sub>4</sub> , SO <sub>3</sub> as well as S <sub>2</sub> O <sub>3</sub>                                   | (Suzuki et al., 2007; Sorokin et al., 2012) |
|     | <i>Desulfotomaculum</i> (Fmt)    | 5  | Some species reduce S <sub>2</sub> O <sub>3</sub> , SO <sub>3</sub> and S <sup>0</sup> while others reduce SO <sub>4</sub>      | (Hagenauer et al., 1997; Love et al., 1993) |
|     |                                  |    |                                                                                                                                 |                                             |
| 190 | <i>Desulfovibrio</i> (Delta)     | 18 | Species can reduce SO <sub>4</sub> , S <sub>2</sub> O <sub>3</sub> as well as S <sup>0</sup>                                    | (Motamedi and Pedersen, 1998)               |
|     | <i>Desulfuromonas</i> (Delta)    | 13 | Species can reduce S <sup>0</sup>                                                                                               | (An and Picardal, 2015)                     |
|     | <i>Desulfatibacillum</i> (Delta) | 9  | Species can reduce SO <sub>4</sub> , SO <sub>3</sub> as well as S <sub>2</sub> O <sub>3</sub>                                   | (Cravo-Laureau et al., 2004)                |
|     | <i>Desulfotomaculum</i> (Fmt)    | 9  | Some species reduce S <sub>2</sub> O <sub>3</sub> , SO <sub>3</sub> and S <sup>0</sup> while others reduce SO <sub>4</sub>      | (Hagenauer et al., 1997; Love et al., 1993) |
|     | <i>Archaeoglobus</i> (EuA)       | 6  | Species can reduce SO <sub>4</sub> , SO <sub>3</sub> as well as S <sub>2</sub> O <sub>3</sub> but S <sup>0</sup> inhibit growth | (Burggraf et al., 1990)                     |
|     | <i>Desulfobacterium</i> (Fmt)    | 6  | Species can reduce S <sup>0</sup> , SO <sub>3</sub> as well as S <sub>2</sub> O <sub>3</sub>                                    | (Utkin et al., 1994)                        |
|     | <i>Desulfobacterium</i> (Delta)  | 6  | Species can reduce SO <sub>4</sub> , SO <sub>3</sub> as well as S <sub>2</sub> O <sub>3</sub>                                   | (Brysch et al., 1987)                       |
|     | <i>Desulfotalea</i> (Delta)      | 6  | Species can reduce SO <sub>4</sub> , SO <sub>3</sub> as well as S <sub>2</sub> O <sub>3</sub>                                   | (Knoblauch et al., 1999)                    |
|     | <i>Desulfococcus</i> (Delta)     | 5  | Species can reduce SO <sub>4</sub> and SO <sub>3</sub>                                                                          | (Platen et al., 1990)                       |
| 220 | <i>Desulfovibrio</i> (Delta)     | 16 | Species can reduce SO <sub>4</sub> , S <sub>2</sub> O <sub>3</sub> as well as S <sup>0</sup>                                    | (Motamedi and Pedersen, 1998)               |
|     | <i>Desulfuromonas</i> (Delta)    | 10 | Species can reduce S <sup>0</sup>                                                                                               | (An and Picardal, 2015)                     |
|     | <i>Desulfatibacillum</i> (Delta) | 10 | Species can reduce SO <sub>4</sub> , SO <sub>3</sub> as well as S <sub>2</sub> O <sub>3</sub>                                   | (Cravo-Laureau et al., 2004)                |
|     | <i>Desulfobacterium</i> (Delta)  | 9  | Species can reduce SO <sub>4</sub> , SO <sub>3</sub> as well as S <sub>2</sub> O <sub>3</sub>                                   | (Brysch et al., 1987)                       |
|     | <i>Desulfotomaculum</i> (Fmt)    | 9  | Some species reduce S <sub>2</sub> O <sub>3</sub> , SO <sub>3</sub> and S <sup>0</sup> while others reduce SO <sub>4</sub>      | (Hagenauer et al., 1997; Love et al., 1993) |
|     | <i>Desulfococcus</i> (Delta)     | 6  | Species can reduce SO <sub>4</sub> and SO <sub>3</sub>                                                                          | (Platen et al., 1990)                       |
|     | <i>Desulfotalea</i> (Delta)      | 6  | Species can reduce SO <sub>4</sub> , SO <sub>3</sub> as well as S <sub>2</sub> O <sub>3</sub>                                   | (Knoblauch et al., 1999)                    |
|     | <i>Desulfurivibrio</i> (Delta)   | 6  | Species can reduce S <sup>0</sup> , polysulfides & S <sub>2</sub> O <sub>3</sub> but not sulfate                                | (Sorokin et al., 2008)                      |
| 260 | <i>Desulfovibrio</i> (Delta)     | 15 | Species can reduce SO <sub>4</sub> , S <sub>2</sub> O <sub>3</sub> as well as S <sup>0</sup>                                    | (Motamedi and Pedersen, 1998)               |

|     |                                  |    |                                                                                                  |                                             |
|-----|----------------------------------|----|--------------------------------------------------------------------------------------------------|---------------------------------------------|
|     | <i>Desulfurivibrio</i> (Delta)   | 14 | Species can reduce S <sup>0</sup> , polysulfides & S <sub>2</sub> O <sub>3</sub> but not sulfate | (Sorokin et al., 2008)                      |
|     | <i>Desulfotalea</i> (Delta)      | 12 | Species can reduce SO <sub>4</sub> , SO <sub>3</sub> as well as S <sub>2</sub> O <sub>3</sub>    | (Knoblauch et al., 1999)                    |
|     | <i>Desulfuromonas</i> (Delta)    | 10 | Species can reduce S <sup>0</sup>                                                                | (An and Picardal, 2015)                     |
|     | <i>Desulfatibacillum</i> (Delta) | 8  | Species can reduce SO <sub>4</sub> , SO <sub>3</sub> as well as S <sub>2</sub> O <sub>3</sub>    | (Cravo-Laureau et al., 2004)                |
|     | <i>Desulfobulbus</i> (Delta)     | 7  | Species can reduce SO <sub>4</sub> , SO <sub>3</sub> as well as S <sub>2</sub> O <sub>3</sub>    | (Suzuki et al., 2007; Sorokin et al., 2012) |
|     | <i>Desulfobacterium</i> (Delta)  | 6  | Species can reduce SO <sub>4</sub> , SO <sub>3</sub> as well as S <sub>2</sub> O <sub>3</sub>    | (Brysch et al., 1987)                       |
| 295 | <i>Desulfotalea</i> (Delta)      | 15 | Species can reduce SO <sub>4</sub> , SO <sub>3</sub> as well as S <sub>2</sub> O <sub>3</sub>    | (Knoblauch et al., 1999)                    |
|     | <i>Desulfurivibrio</i> (Delta)   | 15 | Species can reduce S <sup>0</sup> , polysulfides & S <sub>2</sub> O <sub>3</sub> but not sulfate | (Sorokin et al., 2008)                      |
|     | <i>Desulfovibrio</i> (Delta)     | 13 | Species can reduce SO <sub>4</sub> , S <sub>2</sub> O <sub>3</sub> as well as S <sup>0</sup>     | (Motamedi and Pedersen, 1998)               |
|     | <i>Desulfuromonas</i> (Delta)    | 10 | Species can reduce S <sup>0</sup>                                                                | (An and Picardal, 2015)                     |
|     | <i>Desulfatibacillum</i> (Delta) | 7  | Species can reduce SO <sub>4</sub> , SO <sub>3</sub> as well as S <sub>2</sub> O <sub>3</sub>    | (Cravo-Laureau et al., 2004)                |
|     | <i>Desulfobacterium</i> (Delta)  | 6  | Species can reduce SO <sub>4</sub> , SO <sub>3</sub> as well as S <sub>2</sub> O <sub>3</sub>    | (Brysch et al., 1987)                       |

\* EuA = Phylum *Euryarchaeota*; Fmt = Phylum *Firmicutes* and Delta = Class *Deltaproteobacteria*.

**Table S32.** Sulfate-reducing genera that were found to be most abundant along SSK42/6, according to the taxonomic classification of metagenomic reads (only those entities which had ≥ 5% relative abundance among all sulfate-reducing genera identified in a given sediment-sample have been included).

| Sediment-depths explored (in cmbsf) | Genera identified (Phylum/Class*) | Relative abundance among all sulfate-reducing genera detected in the sample (in %) | Sulfur compounds reduction phenotype(s) known for the genus                                                                     | Reference(s)                                |
|-------------------------------------|-----------------------------------|------------------------------------------------------------------------------------|---------------------------------------------------------------------------------------------------------------------------------|---------------------------------------------|
| 2                                   | <i>Desulfovibrio</i> (Delta)      | 16                                                                                 | Species can reduce SO <sub>4</sub> , S <sub>2</sub> O <sub>3</sub> as well as S <sup>0</sup>                                    | (Motamedi and Pedersen, 1998)               |
|                                     | <i>Desulfatibacillum</i> (Delta)  | 12                                                                                 | Species can reduce SO <sub>4</sub> , SO <sub>3</sub> as well as S <sub>2</sub> O <sub>3</sub>                                   | (Cravo-Laureau et al., 2004)                |
|                                     | <i>Desulfotomaculum</i> (Fmt)     | 9                                                                                  | Some species reduce S <sub>2</sub> O <sub>3</sub> , SO <sub>3</sub> and S <sup>0</sup> while others reduce SO <sub>4</sub>      | (Hagenauer et al., 1997; Love et al., 1993) |
|                                     | <i>Desulfococcus</i> (Delta)      | 8                                                                                  | Species can reduce SO <sub>4</sub> and SO <sub>3</sub>                                                                          | (Platen et al., 1990)                       |
|                                     | <i>Archaeoglobus</i> (EuA)        | 8                                                                                  | Species can reduce SO <sub>4</sub> , SO <sub>3</sub> as well as S <sub>2</sub> O <sub>3</sub> but S <sup>0</sup> inhibit growth | (Burggraf et al., 1990)                     |
|                                     | <i>Desulfobacterium</i> (Delta)   | 7                                                                                  | Species can reduce SO <sub>4</sub> , SO <sub>3</sub> as well as S <sub>2</sub> O <sub>3</sub>                                   | (Brysch et al., 1987)                       |
|                                     | <i>Desulfuromonas</i> (Delta)     | 6                                                                                  | Species can reduce S <sup>0</sup>                                                                                               | (An and Picardal, 2015)                     |
|                                     | <i>Desulfitobacterium</i> (Fmt)   | 5                                                                                  | Species can reduce S <sup>0</sup> , SO <sub>3</sub> as well as S <sub>2</sub> O <sub>3</sub>                                    | (Utkin et al., 1994)                        |
| 30                                  | <i>Desulfovibrio</i> (Delta)      | 16                                                                                 | Species can reduce SO <sub>4</sub> , S <sub>2</sub> O <sub>3</sub> as well as S <sup>0</sup>                                    | (Motamedi and Pedersen, 1998)               |
|                                     | <i>Desulfuromonas</i> (Delta)     | 11                                                                                 | Species can reduce S <sup>0</sup>                                                                                               | (An and Picardal, 2015)                     |
|                                     | <i>Desulfatibacillum</i> (Delta)  | 8                                                                                  | Species can reduce SO <sub>4</sub> , SO <sub>3</sub> as well as S <sub>2</sub> O <sub>3</sub>                                   | (Cravo-Laureau et al., 2004)                |
|                                     | <i>Desulfotomaculum</i> (Fmt)     | 8                                                                                  | Some species reduce S <sub>2</sub> O <sub>3</sub> , SO <sub>3</sub> and S <sup>0</sup> while others reduce SO <sub>4</sub>      | (Hagenauer et al., 1997; Love et al., 1993) |
|                                     | <i>Archaeoglobus</i> (EuA)        | 7                                                                                  | Species can reduce SO <sub>4</sub> , SO <sub>3</sub> as well as S <sub>2</sub> O <sub>3</sub> but S <sup>0</sup> inhibit growth | (Burggraf et al., 1990)                     |
|                                     | <i>Desulfobacterium</i> (Delta)   | 6                                                                                  | Species can reduce SO <sub>4</sub> , SO <sub>3</sub> as well as S <sub>2</sub> O <sub>3</sub>                                   | (Brysch et al., 1987)                       |
|                                     | <i>Desulfotalea</i> (Delta)       | 5                                                                                  | Species can reduce SO <sub>4</sub> , SO <sub>3</sub> as well as S <sub>2</sub> O <sub>3</sub>                                   | (Knoblauch et al., 1999)                    |
|                                     | <i>Desulfococcus</i> (Delta)      | 5                                                                                  | Species can reduce SO <sub>4</sub> and SO <sub>3</sub>                                                                          | (Platen et al., 1990)                       |
|                                     | <i>Desulfitobacterium</i> (Fmt)   | 5                                                                                  | Species can reduce S <sup>0</sup> , SO <sub>3</sub> as well as S <sub>2</sub> O <sub>3</sub>                                    | (Utkin et al., 1994)                        |
| 45                                  | <i>Desulfovibrio</i> (Delta)      | 18                                                                                 | Species can reduce SO <sub>4</sub> , S <sub>2</sub> O <sub>3</sub> as well as S <sup>0</sup>                                    | (Motamedi and Pedersen, 1998)               |
|                                     | <i>Desulfuromonas</i> (Delta)     | 15                                                                                 | Species can reduce S <sup>0</sup>                                                                                               | (An and Picardal, 2015)                     |
|                                     | <i>Desulfotalea</i> (Delta)       | 7                                                                                  | Species can reduce SO <sub>4</sub> , SO <sub>3</sub> as well as S <sub>2</sub> O <sub>3</sub>                                   | (Knoblauch et al., 1999)                    |
|                                     | <i>Desulfatibacillum</i> (Delta)  | 7                                                                                  | Species can reduce SO <sub>4</sub> , SO <sub>3</sub> as well as S <sub>2</sub> O <sub>3</sub>                                   | (Cravo-Laureau et al., 2004)                |
|                                     | <i>Desulfotomaculum</i> (Fmt)     | 6                                                                                  | Some species reduce S <sub>2</sub> O <sub>3</sub> , SO <sub>3</sub> and S <sup>0</sup> while others reduce SO <sub>4</sub>      | (Hagenauer et al., 1997; Love et al., 1993) |
|                                     | <i>Desulfobacterium</i> (Delta)   | 6                                                                                  | Species can reduce SO <sub>4</sub> , SO <sub>3</sub> as well as S <sub>2</sub> O <sub>3</sub>                                   | (Brysch et al., 1987)                       |
|                                     | <i>Desulfococcus</i> (Delta)      | 5                                                                                  | Species can reduce SO <sub>4</sub> and SO <sub>3</sub>                                                                          | (Platen et al., 1990)                       |
|                                     | <i>Archaeoglobus</i> (EuA)        | 5                                                                                  | Species can reduce SO <sub>4</sub> , SO <sub>3</sub> as well as S <sub>2</sub> O <sub>3</sub> but S <sup>0</sup> inhibit growth | (Burggraf et al., 1990)                     |
|                                     | <i>Desulfurivibrio</i> (Delta)    | 5                                                                                  | Species can reduce S <sup>0</sup> , polysulfides & S <sub>2</sub> O <sub>3</sub> but not sulfate                                | (Sorokin et al., 2008)                      |

|     |                                  |    |                                                                                                                                 |                                             |
|-----|----------------------------------|----|---------------------------------------------------------------------------------------------------------------------------------|---------------------------------------------|
| 60  | <i>Desulfovibrio</i> (Delta)     | 17 | Species can reduce SO <sub>4</sub> , S <sub>2</sub> O <sub>3</sub> as well as S <sup>0</sup>                                    | (Motamedi and Pedersen, 1998)               |
|     | <i>Desulfuromonas</i> (Delta)    | 11 | Species can reduce S <sup>0</sup>                                                                                               | (An and Picardal, 2015)                     |
|     | <i>Desulfatibacillum</i> (Delta) | 8  | Species can reduce SO <sub>4</sub> , SO <sub>3</sub> as well as S <sub>2</sub> O <sub>3</sub>                                   | (Cravo-Laureau et al., 2004)                |
|     | <i>Desulfotomaculum</i> (Fmt)    | 8  | Some species reduce S <sub>2</sub> O <sub>3</sub> , SO <sub>3</sub> and S <sup>0</sup> while others reduce SO <sub>4</sub>      | (Hagenauer et al., 1997; Love et al., 1993) |
|     | <i>Desulfotalea</i> (Delta)      | 7  | Species can reduce SO <sub>4</sub> , SO <sub>3</sub> as well as S <sub>2</sub> O <sub>3</sub>                                   | (Knoblauch et al., 1999)                    |
|     | <i>Desulfobacterium</i> (Delta)  | 6  | Species can reduce SO <sub>4</sub> , SO <sub>3</sub> as well as S <sub>2</sub> O <sub>3</sub>                                   | (Brysch et al., 1987)                       |
|     | <i>Archaeoglobus</i> (EuA)       | 6  | Species can reduce SO <sub>4</sub> , SO <sub>3</sub> as well as S <sub>2</sub> O <sub>3</sub> but S <sup>0</sup> inhibit growth | (Burggraf et al., 1990)                     |
|     | <i>Desulfitobacterium</i> (Fmt)  | 6  | Species can reduce S <sup>0</sup> , SO <sub>3</sub> as well as S <sub>2</sub> O <sub>3</sub>                                    | (Utkin et al., 1994)                        |
|     | <i>Desulfococcus</i> (Delta)     | 5  | Species can reduce SO <sub>4</sub> and SO <sub>3</sub>                                                                          | (Platen et al., 1990)                       |
| 75  | <i>Desulfovibrio</i> (Delta)     | 18 | Species can reduce SO <sub>4</sub> , S <sub>2</sub> O <sub>3</sub> as well as S <sup>0</sup>                                    | (Motamedi and Pedersen, 1998)               |
|     | <i>Desulfuromonas</i> (Delta)    | 13 | Species can reduce S <sup>0</sup>                                                                                               | (An and Picardal, 2015)                     |
|     | <i>Desulfatibacillum</i> (Delta) | 9  | Species can reduce SO <sub>4</sub> , SO <sub>3</sub> as well as S <sub>2</sub> O <sub>3</sub>                                   | (Cravo-Laureau et al., 2004)                |
|     | <i>Desulfotalea</i> (Delta)      | 8  | Species can reduce SO <sub>4</sub> , SO <sub>3</sub> as well as S <sub>2</sub> O <sub>3</sub>                                   | (Knoblauch et al., 1999)                    |
|     | <i>Desulfobacterium</i> (Delta)  | 6  | Species can reduce SO <sub>4</sub> , SO <sub>3</sub> as well as S <sub>2</sub> O <sub>3</sub>                                   | (Brysch et al., 1987)                       |
|     | <i>Desulfotomaculum</i> (Fmt)    | 6  | Some species reduce S <sub>2</sub> O <sub>3</sub> , SO <sub>3</sub> and S <sup>0</sup> while others reduce SO <sub>4</sub>      | (Hagenauer et al., 1997; Love et al., 1993) |
|     | <i>Desulfococcus</i> (Delta)     | 5  | Species can reduce SO <sub>4</sub> and SO <sub>3</sub>                                                                          | (Platen et al., 1990)                       |
|     | <i>Desulfurivibrio</i> (Delta)   | 5  | Species can reduce S <sup>0</sup> , polysulfides & S <sub>2</sub> O <sub>3</sub> but not sulfate                                | (Sorokin et al., 2008)                      |
| 90  | <i>Desulfovibrio</i> (Delta)     | 18 | Species can reduce SO <sub>4</sub> , S <sub>2</sub> O <sub>3</sub> as well as S <sup>0</sup>                                    | (Motamedi and Pedersen, 1998)               |
|     | <i>Desulfuromonas</i> (Delta)    | 14 | Species can reduce S <sup>0</sup>                                                                                               | (An and Picardal, 2015)                     |
|     | <i>Desulfatibacillum</i> (Delta) | 9  | Species can reduce SO <sub>4</sub> , SO <sub>3</sub> as well as S <sub>2</sub> O <sub>3</sub>                                   | (Cravo-Laureau et al., 2004)                |
|     | <i>Desulfotalea</i> (Delta)      | 8  | Species can reduce SO <sub>4</sub> , SO <sub>3</sub> as well as S <sub>2</sub> O <sub>3</sub>                                   | (Knoblauch et al., 1999)                    |
|     | <i>Desulfobacterium</i> (Delta)  | 7  | Species can reduce SO <sub>4</sub> , SO <sub>3</sub> as well as S <sub>2</sub> O <sub>3</sub>                                   | (Brysch et al., 1987)                       |
|     | <i>Desulfococcus</i> (Delta)     | 5  | Species can reduce SO <sub>4</sub> and SO <sub>3</sub>                                                                          | (Platen et al., 1990)                       |
|     | <i>Desulfotomaculum</i> (Fmt)    | 5  | Some species reduce S <sub>2</sub> O <sub>3</sub> , SO <sub>3</sub> and S <sup>0</sup> while others reduce SO <sub>4</sub>      | (Hagenauer et al., 1997; Love et al., 1993) |
|     | <i>Desulfurivibrio</i> (Delta)   | 5  | Species can reduce S <sup>0</sup> , polysulfides & S <sub>2</sub> O <sub>3</sub> but not sulfate                                | (Sorokin et al., 2008)                      |
| 120 | <i>Desulfovibrio</i> (Delta)     | 17 | Species can reduce SO <sub>4</sub> , S <sub>2</sub> O <sub>3</sub> as well as S <sup>0</sup>                                    | (Motamedi and Pedersen, 1998)               |
|     | <i>Desulfuromonas</i> (Delta)    | 13 | Species can reduce S <sup>0</sup>                                                                                               | (An and Picardal, 2015)                     |
|     | <i>Desulfotalea</i> (Delta)      | 8  | Species can reduce SO <sub>4</sub> , SO <sub>3</sub> as well as S <sub>2</sub> O <sub>3</sub>                                   | (Knoblauch et al., 1999)                    |
|     | <i>Desulfatibacillum</i> (Delta) | 8  | Species can reduce SO <sub>4</sub> , SO <sub>3</sub> as well as S <sub>2</sub> O <sub>3</sub>                                   | (Cravo-Laureau et al., 2004)                |
|     | <i>Desulfobacterium</i> (Delta)  | 7  | Species can reduce SO <sub>4</sub> , SO <sub>3</sub> as well as S <sub>2</sub> O <sub>3</sub>                                   | (Brysch et al., 1987)                       |
|     | <i>Desulfotomaculum</i> (Fmt)    | 6  | Some species reduce S <sub>2</sub> O <sub>3</sub> , SO <sub>3</sub> and S <sup>0</sup> while others reduce SO <sub>4</sub>      | (Hagenauer et al., 1997; Love et al., 1993) |
|     | <i>Desulfurivibrio</i> (Delta)   | 6  | Species can reduce S <sup>0</sup> , polysulfides & S <sub>2</sub> O <sub>3</sub> but not sulfate                                | (Sorokin et al., 2008)                      |
|     | <i>Desulfococcus</i> (Delta)     | 5  | Species can reduce SO <sub>4</sub> and SO <sub>3</sub>                                                                          | (Platen et al., 1990)                       |
|     | <i>Archaeoglobus</i> (EuA)       | 5  | Species can reduce SO <sub>4</sub> , SO <sub>3</sub> as well as S <sub>2</sub> O <sub>3</sub> but S <sup>0</sup> inhibit growth | (Burggraf et al., 1990)                     |
| 135 | <i>Desulfovibrio</i> (Delta)     | 19 | Species can reduce SO <sub>4</sub> , S <sub>2</sub> O <sub>3</sub> as well as S <sup>0</sup>                                    | (Motamedi and Pedersen, 1998)               |
|     | <i>Desulfuromonas</i> (Delta)    | 14 | Species can reduce S <sup>0</sup>                                                                                               | (An and Picardal, 2015)                     |
|     | <i>Desulfatibacillum</i> (Delta) | 9  | Species can reduce SO <sub>4</sub> , SO <sub>3</sub> as well as S <sub>2</sub> O <sub>3</sub>                                   | (Cravo-Laureau et al., 2004)                |
|     | <i>Desulfobacterium</i> (Delta)  | 7  | Species can reduce SO <sub>4</sub> , SO <sub>3</sub> as well as S <sub>2</sub> O <sub>3</sub>                                   | (Brysch et al., 1987)                       |
|     | <i>Desulfotalea</i> (Delta)      | 7  | Species can reduce SO <sub>4</sub> , SO <sub>3</sub> as well as S <sub>2</sub> O <sub>3</sub>                                   | (Knoblauch et al., 1999)                    |
|     | <i>Desulfotomaculum</i> (Fmt)    | 6  | Some species reduce S <sub>2</sub> O <sub>3</sub> , SO <sub>3</sub> and S <sup>0</sup> while others reduce SO <sub>4</sub>      | (Hagenauer et al., 1997; Love et al., 1993) |
|     | <i>Desulfococcus</i> (Delta)     | 5  | Species can reduce SO <sub>4</sub> and SO <sub>3</sub>                                                                          | (Platen et al., 1990)                       |
|     | <i>Desulfomicrobium</i> (Delta)  | 5  | Species can reduce SO <sub>4</sub> , SO <sub>3</sub> & S <sub>2</sub> O <sub>3</sub> but not S <sup>0</sup>                     | (Thevenieau et al., 2007)                   |
|     | <i>Desulfurivibrio</i> (Delta)   | 5  | Species can reduce S <sup>0</sup> , polysulfides & S <sub>2</sub> O <sub>3</sub> but not sulfate                                | (Sorokin et al., 2008)                      |
|     |                                  |    |                                                                                                                                 |                                             |
| 175 | <i>Desulfovibrio</i> (Delta)     | 19 | Species can reduce SO <sub>4</sub> , S <sub>2</sub> O <sub>3</sub> as well as S <sup>0</sup>                                    | (Motamedi and Pedersen, 1998)               |
|     | <i>Desulfuromonas</i> (Delta)    | 18 | Species can reduce S <sup>0</sup>                                                                                               | (An and Picardal, 2015)                     |
|     | <i>Desulfatibacillum</i> (Delta) | 8  | Species can reduce SO <sub>4</sub> , SO <sub>3</sub> as well as S <sub>2</sub> O <sub>3</sub>                                   | (Cravo-Laureau et al., 2004)                |
|     | <i>Desulfobacterium</i> (Delta)  | 7  | Species can reduce SO <sub>4</sub> , SO <sub>3</sub> as well as S <sub>2</sub> O <sub>3</sub>                                   | (Brysch et al., 1987)                       |

|     |                                   |    |                                                                                                                                 |                                             |
|-----|-----------------------------------|----|---------------------------------------------------------------------------------------------------------------------------------|---------------------------------------------|
|     | <i>Desulfotalea</i> (Delta)       | 7  | Species can reduce SO <sub>4</sub> , SO <sub>3</sub> as well as S <sub>2</sub> O <sub>3</sub>                                   | (Knoblauch et al., 1999)                    |
|     | <i>Desulfurivibrio</i> (Delta)    | 7  | Species can reduce S <sup>0</sup> , polysulfides & S <sub>2</sub> O <sub>3</sub> but not sulfate                                | (Sorokin et al., 2008)                      |
|     | <i>Desulfomicrobium</i> (Delta)   | 5  | Species can reduce SO <sub>4</sub> , SO <sub>3</sub> & S <sub>2</sub> O <sub>3</sub> but not S <sup>0</sup>                     | (Thevenieau et al., 2007)                   |
| 220 | <i>Desulfuromonas</i> (Delta)     | 20 | Species can reduce S <sup>0</sup>                                                                                               | (An and Picardal, 2015)                     |
|     | <i>Desulfovibrio</i> (Delta)      | 14 | Species can reduce SO <sub>4</sub> , S <sub>2</sub> O <sub>3</sub> as well as S <sup>0</sup>                                    | (Motamedi and Pedersen, 1998)               |
|     | <i>Desulfurivibrio</i> (Delta)    | 10 | Species can reduce S <sup>0</sup> , polysulfides & S <sub>2</sub> O <sub>3</sub> but not sulfate                                | (Sorokin et al., 2008)                      |
|     | <i>Desulfobacterium</i> (Delta)   | 9  | Species can reduce SO <sub>4</sub> , SO <sub>3</sub> as well as S <sub>2</sub> O <sub>3</sub>                                   | (Brysch et al., 1987)                       |
|     | <i>Desulfatibacillum</i> (Delta)  | 8  | Species can reduce SO <sub>4</sub> , SO <sub>3</sub> as well as S <sub>2</sub> O <sub>3</sub>                                   | (Cravo-Laureau et al., 2004)                |
|     | <i>Desulfurispirillum</i> (Chrys) | 6  | Species can reduce S <sup>0</sup> & polysulfides                                                                                | (Sorokin et al., 2007)                      |
|     | <i>Desulfotalea</i> (Delta)       | 6  | Species can reduce SO <sub>4</sub> , SO <sub>3</sub> as well as S <sub>2</sub> O <sub>3</sub>                                   | (Knoblauch et al., 1999)                    |
|     | <i>Desulfomicrobium</i> (Delta)   | 5  | Species can reduce SO <sub>4</sub> , SO <sub>3</sub> & S <sub>2</sub> O <sub>3</sub> but not S <sup>0</sup>                     | (Thevenieau et al., 2007)                   |
| 250 | <i>Desulfovibrio</i> (Delta)      | 18 | Species can reduce SO <sub>4</sub> , S <sub>2</sub> O <sub>3</sub> as well as S <sup>0</sup>                                    | (Motamedi and Pedersen, 1998)               |
|     | <i>Desulfuromonas</i> (Delta)     | 12 | Species can reduce S <sup>0</sup>                                                                                               | (An and Picardal, 2015)                     |
|     | <i>Desulfotomaculum</i> (Fmt)     | 7  | Some species reduce S <sub>2</sub> O <sub>3</sub> , SO <sub>3</sub> and S <sup>0</sup> while others reduce SO <sub>4</sub>      | (Hagenauer et al., 1997; Love et al., 1993) |
|     | <i>Desulfococcus</i> (Delta)      | 6  | Species can reduce SO <sub>4</sub> and SO <sub>3</sub>                                                                          | (Platen et al., 1990)                       |
|     | <i>Desulfatibacillum</i> (Delta)  | 6  | Species can reduce SO <sub>4</sub> , SO <sub>3</sub> as well as S <sub>2</sub> O <sub>3</sub>                                   | (Cravo-Laureau et al., 2004)                |
|     | <i>Archaeoglobus</i> (EuA)        | 6  | Species can reduce SO <sub>4</sub> , SO <sub>3</sub> as well as S <sub>2</sub> O <sub>3</sub> but S <sup>0</sup> inhibit growth | (Burggraf et al., 1990)                     |
|     | <i>Desulfobacterium</i> (Delta)   | 5  | Species can reduce SO <sub>4</sub> , SO <sub>3</sub> as well as S <sub>2</sub> O <sub>3</sub>                                   | (Brysch et al., 1987)                       |
|     | <i>Desulfohalobium</i> (Delta)    | 5  | All species can reduce SO <sub>4</sub> & S <sub>2</sub> O <sub>3</sub> ; some can reduce SO <sub>3</sub> & S <sup>0</sup>       | (Ollivier et al., 1991)                     |
|     | <i>Desulfurispirillum</i> (Chrys) | 5  | Species can reduce S <sup>0</sup> & polysulfides                                                                                | (Sorokin et al., 2007)                      |
| 265 | <i>Desulfotalea</i> (Delta)       | 5  | Species can reduce SO <sub>4</sub> , SO <sub>3</sub> as well as S <sub>2</sub> O <sub>3</sub>                                   | (Knoblauch et al., 1999)                    |
|     | <i>Desulfovibrio</i> (Delta)      | 14 | Species can reduce SO <sub>4</sub> , S <sub>2</sub> O <sub>3</sub> as well as S <sup>0</sup>                                    | (Motamedi and Pedersen, 1998)               |
|     | <i>Desulfotomaculum</i> (Fmt)     | 11 | Some species reduce S <sub>2</sub> O <sub>3</sub> , SO <sub>3</sub> and S <sup>0</sup> while others reduce SO <sub>4</sub>      | (Hagenauer et al., 1997; Love et al., 1993) |
|     | <i>Archaeoglobus</i> (EuA)        | 11 | Species can reduce SO <sub>4</sub> , SO <sub>3</sub> as well as S <sub>2</sub> O <sub>3</sub> but S <sup>0</sup> inhibit growth | (Burggraf et al., 1990)                     |
|     | <i>Desulfatibacillum</i> (Delta)  | 9  | Species can reduce SO <sub>4</sub> , SO <sub>3</sub> as well as S <sub>2</sub> O <sub>3</sub>                                   | (Cravo-Laureau et al., 2004)                |
|     | <i>Desulfobacterium</i> (Fmt)     | 6  | Species can reduce S <sup>0</sup> , SO <sub>3</sub> as well as S <sub>2</sub> O <sub>3</sub>                                    | (Utkin et al., 1994)                        |
|     | <i>Desulfococcus</i> (Delta)      | 6  | Species can reduce SO <sub>4</sub> and SO <sub>3</sub>                                                                          | (Platen et al., 1990)                       |
|     | <i>Desulfobacterium</i> (Delta)   | 6  | Species can reduce SO <sub>4</sub> , SO <sub>3</sub> as well as S <sub>2</sub> O <sub>3</sub>                                   | (Brysch et al., 1987)                       |
| 275 | <i>Desulfovibrio</i> (Delta)      | 23 | Species can reduce SO <sub>4</sub> , S <sub>2</sub> O <sub>3</sub> as well as S <sup>0</sup>                                    | (Motamedi and Pedersen, 1998)               |
|     | <i>Desulfuromonas</i> (Delta)     | 13 | Species can reduce S <sup>0</sup>                                                                                               | (An and Picardal, 2015)                     |
|     | <i>Desulfobacterium</i> (Delta)   | 6  | Species can reduce SO <sub>4</sub> , SO <sub>3</sub> as well as S <sub>2</sub> O <sub>3</sub>                                   | (Brysch et al., 1987)                       |
|     | <i>Desulfurivibrio</i> (Delta)    | 6  | Species can reduce S <sup>0</sup> , polysulfides & S <sub>2</sub> O <sub>3</sub> but not sulfate                                | (Sorokin et al., 2008)                      |
|     | <i>Desulfatibacillum</i> (Delta)  | 6  | Species can reduce SO <sub>4</sub> , SO <sub>3</sub> as well as S <sub>2</sub> O <sub>3</sub>                                   | (Cravo-Laureau et al., 2004)                |
|     | <i>Desulfococcus</i> (Delta)      | 5  | Species can reduce SO <sub>4</sub> and SO <sub>3</sub>                                                                          | (Platen et al., 1990)                       |
|     | <i>Desulfohalobium</i> (Delta)    | 5  | All species can reduce SO <sub>4</sub> & S <sub>2</sub> O <sub>3</sub> ; some can reduce SO <sub>3</sub> & S <sup>0</sup>       | (Ollivier et al., 1991)                     |
|     | <i>Desulfomicrobium</i> (Delta)   | 5  | Species can reduce SO <sub>4</sub> , SO <sub>3</sub> & S <sub>2</sub> O <sub>3</sub> but not S <sup>0</sup>                     | (Thevenieau et al., 2007)                   |
|     | <i>Desulfotalea</i> (Delta)       | 5  | Species can reduce SO <sub>4</sub> , SO <sub>3</sub> as well as S <sub>2</sub> O <sub>3</sub>                                   | (Knoblauch et al., 1999)                    |
|     | <i>Desulfotomaculum</i> (Fmt)     | 5  | Some species reduce S <sub>2</sub> O <sub>3</sub> , SO <sub>3</sub> and S <sup>0</sup> while others reduce SO <sub>4</sub>      | (Hagenauer et al., 1997; Love et al., 1993) |
|     | <i>Desulfurispirillum</i> (Chrys) | 5  | Species can reduce S <sup>0</sup> & polysulfides                                                                                | (Sorokin et al., 2007)                      |

\* EuA = Phylum *Euryarchaeota*; Fmt = Phylum *Firmicutes*; Delta = Class *Deltaproteobacteria* and Chrys = Phylum *Chrysiogenetes*.

**Table S33.** Methanogenic genera that were found to be most abundant along SSK42/5, according to the taxonomic classification of metagenomic reads (only those entities which had  $\geq 5\%$  relative abundance among all methane-producing genera identified in a given sediment-sample have been included).

| Sediment-depths explored (in cmbsf) | Genus                      | Relative abundance among all methanogenic genera detected in the sample (in %) | Methanogenic pathway that is present in all members of the genus (indicated by '+' sign) |                |              |                   | Reference(s)             |
|-------------------------------------|----------------------------|--------------------------------------------------------------------------------|------------------------------------------------------------------------------------------|----------------|--------------|-------------------|--------------------------|
|                                     |                            |                                                                                | Hydrogenotrophic                                                                         | Methylotrophic | Acetoclastic | Formate-utilizing |                          |
| 0                                   | <i>Methanosarcina</i>      | 16                                                                             | -                                                                                        | +              | -            | -                 | (Oren, 2014a)            |
|                                     | <i>Methanocaldococcus</i>  | 14                                                                             | +                                                                                        | -              | -            | -                 | (Oren, 2014b)            |
|                                     | <i>Methanothermobacter</i> | 9                                                                              | +                                                                                        | -              | -            | -                 | (Oren, 2014c)            |
|                                     | <i>Methanococcus</i>       | 8                                                                              | +                                                                                        | -              | -            | -                 | (Oren, 2014d)            |
|                                     | <i>Methanococcoides</i>    | 5                                                                              | -                                                                                        | +              | -            | -                 | (Oren, 2014a)            |
| 15                                  | <i>Methanosarcina</i>      | 15                                                                             | -                                                                                        | +              | -            | -                 | (Oren, 2014a)            |
|                                     | <i>Methanocaldococcus</i>  | 14                                                                             | +                                                                                        | -              | -            | -                 | (Oren, 2014b)            |
|                                     | <i>Methanothermobacter</i> | 10                                                                             | +                                                                                        | -              | -            | -                 | (Oren, 2014c)            |
|                                     | <i>Methanococcus</i>       | 9                                                                              | +                                                                                        | -              | -            | -                 | (Oren, 2014d)            |
|                                     | <i>Methanococcoides</i>    | 5                                                                              | -                                                                                        | +              | -            | -                 | (Oren, 2014a)            |
| 45                                  | <i>Methanosarcina</i>      | 16                                                                             | -                                                                                        | +              | -            | -                 | (Oren, 2014a)            |
|                                     | <i>Methanocaldococcus</i>  | 13                                                                             | +                                                                                        | -              | -            | -                 | (Oren, 2014b)            |
|                                     | <i>Methanococcoides</i>    | 10                                                                             | -                                                                                        | -              | -            | -                 | (Oren, 2014a)            |
|                                     | <i>Methanothermobacter</i> | 9                                                                              | +                                                                                        | -              | -            | -                 | (Oren, 2014c)            |
|                                     | <i>Methanococcus</i>       | 7                                                                              | +                                                                                        | -              | -            | -                 | (Oren, 2014d)            |
| 60                                  | <i>Methanosarcina</i>      | 18                                                                             | -                                                                                        | +              | -            | -                 | (Oren, 2014a)            |
|                                     | <i>Methanocaldococcus</i>  | 13                                                                             | +                                                                                        | -              | -            | -                 | (Oren, 2014b)            |
|                                     | <i>Methanothermobacter</i> | 10                                                                             | +                                                                                        | -              | -            | -                 | (Oren, 2014c)            |
|                                     | <i>Methanococcus</i>       | 8                                                                              | +                                                                                        | -              | -            | -                 | (Oren, 2014d)            |
|                                     | <i>Methanococcoides</i>    | 6                                                                              | -                                                                                        | +              | -            | -                 | (Oren, 2014a)            |
| 90                                  | <i>Methanosarcina</i>      | 18                                                                             | -                                                                                        | +              | -            | -                 | (Oren, 2014a)            |
|                                     | <i>Methanocaldococcus</i>  | 13                                                                             | +                                                                                        | -              | -            | -                 | (Oren, 2014b)            |
|                                     | <i>Methanothermobacter</i> | 10                                                                             | +                                                                                        | -              | -            | -                 | (Oren, 2014c)            |
|                                     | <i>Methanococcus</i>       | 7                                                                              | +                                                                                        | -              | -            | -                 | (Oren, 2014d)            |
|                                     | <i>Methanospirillum</i>    | 6                                                                              | +                                                                                        | -              | -            | -                 | (Oren, 2014e)            |
| 120                                 | <i>Methanosarcina</i>      | 18                                                                             | -                                                                                        | +              | -            | -                 | (Oren, 2014a)            |
|                                     | <i>Methanocaldococcus</i>  | 14                                                                             | +                                                                                        | -              | -            | -                 | (Oren, 2014b)            |
|                                     | <i>Methanothermobacter</i> | 10                                                                             | +                                                                                        | -              | -            | -                 | (Oren, 2014c)            |
|                                     | <i>Methanococcus</i>       | 7                                                                              | +                                                                                        | -              | -            | -                 | (Oren, 2014d)            |
|                                     | <i>Methanosaeta</i>        | 6                                                                              | -                                                                                        | -              | +            | -                 | (Patel and Sprott, 1990) |
| 140                                 | <i>Methanosarcina</i>      | 16                                                                             | -                                                                                        | +              | -            | -                 | (Oren, 2014a)            |
|                                     | <i>Methanocaldococcus</i>  | 15                                                                             | +                                                                                        | -              | -            | -                 | (Oren, 2014b)            |
|                                     | <i>Methanothermobacter</i> | 10                                                                             | +                                                                                        | -              | -            | -                 | (Oren, 2014c)            |
|                                     | <i>Methanococcus</i>       | 8                                                                              | +                                                                                        | -              | -            | -                 | (Oren, 2014d)            |
|                                     | <i>Methanopyrus</i>        | 6                                                                              | +                                                                                        | -              | -            | -                 | (Oren, 2014f)            |
| 160                                 | <i>Methanosarcina</i>      | 17                                                                             | -                                                                                        | +              | -            | -                 | (Oren, 2014a)            |
|                                     | <i>Methanocaldococcus</i>  | 12                                                                             | +                                                                                        | -              | -            | -                 | (Oren, 2014b)            |
|                                     | <i>Methanothermobacter</i> | 9                                                                              | +                                                                                        | -              | -            | -                 | (Oren, 2014c)            |
|                                     | <i>Methanococcus</i>       | 8                                                                              | +                                                                                        | -              | -            | -                 | (Oren, 2014d)            |
|                                     | <i>Methanospirillum</i>    | 7                                                                              | +                                                                                        | -              | -            | -                 | (Oren, 2014e)            |
| 190                                 | <i>Methanosarcina</i>      | 16                                                                             | -                                                                                        | +              | -            | -                 | (Oren, 2014a)            |
|                                     | <i>Methanocaldococcus</i>  | 14                                                                             | +                                                                                        | -              | -            | -                 | (Oren, 2014b)            |

|     |                            |    |   |   |   |   |                          |
|-----|----------------------------|----|---|---|---|---|--------------------------|
|     | <i>Methanothermobacter</i> | 10 | + | - | - | - | (Oren, 2014c)            |
|     | <i>Methanococcus</i>       | 8  | + | - | - | - | (Oren, 2014d)            |
|     | <i>Methanosaeta</i>        | 6  | - | - | + | - | (Patel and Sprott, 1990) |
| 220 | <i>Methanosarcina</i>      | 16 | - | + | - | - | (Oren, 2014a)            |
|     | <i>Methanocaldococcus</i>  | 14 | + | - | - | - | (Oren, 2014b)            |
|     | <i>Methanothermobacter</i> | 10 | + | - | - | - | (Oren, 2014c)            |
|     | <i>Methanococcus</i>       | 7  | + | - | - | - | (Oren, 2014d)            |
|     | <i>Methanosaeta</i>        | 6  | - | - | + | - | (Patel and Sprott, 1990) |
| 260 | <i>Methanosarcina</i>      | 16 | - | + | - | - | (Oren, 2014a)            |
|     | <i>Methanocaldococcus</i>  | 14 | + | - | - | - | (Oren, 2014b)            |
|     | <i>Methanothermobacter</i> | 9  | + | - | - | - | (Oren, 2014c)            |
|     | <i>Methanococcus</i>       | 7  | + | - | - | - | (Oren, 2014d)            |
|     | <i>Methanococcoides</i>    | 7  | - | + | - | - | (Oren, 2014a)            |
| 295 | <i>Methanococcoides</i>    | 18 | - | + | - | - | (Oren, 2014a)            |
|     | <i>Methanosarcina</i>      | 17 | - | + | - | - | (Oren, 2014a)            |
|     | <i>Methanosaeta</i>        | 10 | - | - | + | - | (Patel and Sprott, 1990) |
|     | <i>Methanocaldococcus</i>  | 9  | + | - | - | - | (Oren, 2014b)            |

**Table S34.** Methanogenic genera that were found to be most abundant along SSK42/6, according to the taxonomic classification of metagenomic reads (only those entities which had  $\geq 5\%$  relative abundance among all methane-producing genera identified in a given sediment-sample have been included).

| Sediment-depths explored (in cmbsf) | Genus                      | Relative abundance among all methanogenic genera detected in the sample (in %) | Methanogenic pathway that is present in all members of the genus (indicated by '+' sign) |                |              |                   | Reference(s)             |
|-------------------------------------|----------------------------|--------------------------------------------------------------------------------|------------------------------------------------------------------------------------------|----------------|--------------|-------------------|--------------------------|
|                                     |                            |                                                                                | Hydrogenotrophic                                                                         | Methylotrophic | Acetoclastic | Formate-utilizing |                          |
| 2                                   | <i>Methanosarcina</i>      | 16                                                                             | -                                                                                        | +              | -            | -                 | (Oren, 2014a)            |
|                                     | <i>Methanocaldococcus</i>  | 14                                                                             | +                                                                                        | -              | -            | -                 | (Oren, 2014b)            |
|                                     | <i>Methanothermobacter</i> | 9                                                                              | +                                                                                        | -              | -            | -                 | (Oren, 2014c)            |
|                                     | <i>Methanococcus</i>       | 8                                                                              | +                                                                                        | -              | -            | -                 | (Oren, 2014d)            |
|                                     | <i>Methanococcoides</i>    | 5                                                                              | -                                                                                        | +              | -            | -                 | (Oren, 2014a)            |
| 30                                  | <i>Methanosarcina</i>      | 16                                                                             | -                                                                                        | +              | -            | -                 | (Oren, 2014a)            |
|                                     | <i>Methanocaldococcus</i>  | 14                                                                             | +                                                                                        | -              | -            | -                 | (Oren, 2014b)            |
|                                     | <i>Methanothermobacter</i> | 10                                                                             | +                                                                                        | -              | -            | -                 | (Oren, 2014c)            |
|                                     | <i>Methanococcus</i>       | 7                                                                              | +                                                                                        | -              | -            | -                 | (Oren, 2014d)            |
|                                     | <i>Methanococcoides</i>    | 5                                                                              | -                                                                                        | +              | -            | -                 | (Oren, 2014a)            |
| 45                                  | <i>Methanosarcina</i>      | 17                                                                             | -                                                                                        | +              | -            | -                 | (Oren, 2014a)            |
|                                     | <i>Methanocaldococcus</i>  | 13                                                                             | +                                                                                        | -              | -            | -                 | (Oren, 2014b)            |
|                                     | <i>Methanothermobacter</i> | 9                                                                              | +                                                                                        | -              | -            | -                 | (Oren, 2014c)            |
|                                     | <i>Methanococcus</i>       | 8                                                                              | +                                                                                        | -              | -            | -                 | (Oren, 2014d)            |
|                                     | <i>Methanosaeta</i>        | 6                                                                              |                                                                                          | -              | +            | -                 | (Patel and Sprott, 1990) |
| 60                                  | <i>Methanosarcina</i>      | 17                                                                             |                                                                                          | +              | -            | -                 | (Oren, 2014a)            |
|                                     | <i>Methanocaldococcus</i>  | 14                                                                             | +                                                                                        | -              | -            | -                 | (Oren, 2014b)            |
|                                     | <i>Methanothermobacter</i> | 10                                                                             | +                                                                                        | -              | -            | -                 | (Oren, 2014c)            |
|                                     | <i>Methanococcus</i>       | 8                                                                              | +                                                                                        | -              | -            | -                 | (Oren, 2014d)            |

|     |                            |    |   |   |   |   |                          |
|-----|----------------------------|----|---|---|---|---|--------------------------|
|     | <i>Methanosaeta</i>        | 6  | - | - | + | - | (Patel and Sprott, 1990) |
| 75  | <i>Methanosarcina</i>      | 19 | - | + |   | - | (Oren, 2014a)            |
|     | <i>Methanocaldococcus</i>  | 13 | + |   |   | - | (Oren, 2014b)            |
|     | <i>Methanothermobacter</i> | 9  | + |   |   | - | (Oren, 2014c)            |
|     | <i>Methanococcus</i>       | 7  | + |   |   | - | (Oren, 2014d)            |
|     | <i>Methanosaeta</i>        | 5  | - |   | + | - | (Patel and Sprott, 1990) |
| 90  | <i>Methanosarcina</i>      | 18 | - | + | - | - | (Oren, 2014a)            |
|     | <i>Methanocaldococcus</i>  | 13 | + | - |   | - | (Oren, 2014b)            |
|     | <i>Methanothermobacter</i> | 9  | + | - |   | - | (Oren, 2014c)            |
|     | <i>Methanococcus</i>       | 7  | + | - |   | - | (Oren, 2014d)            |
|     | <i>Methanosaeta</i>        | 6  | - | - | + | - | (Patel and Sprott, 1990) |
| 120 | <i>Methanosarcina</i>      | 17 |   | + | - | - | (Oren, 2014a)            |
|     | <i>Methanocaldococcus</i>  | 13 | + | - | - | - | (Oren, 2014b)            |
|     | <i>Methanothermobacter</i> | 9  | + | - | - | - | (Oren, 2014c)            |
|     | <i>Methanococcus</i>       | 8  | + | - | - | - | (Oren, 2014d)            |
|     | <i>Methanobrevibacter</i>  | 7  | + | - | - | - | (Oren, 2014c)            |
| 135 | <i>Methanosarcina</i>      | 21 | - | + | - | - | (Oren, 2014a)            |
|     | <i>Methanocaldococcus</i>  | 13 | + | - | - | - | (Oren, 2014b)            |
|     | <i>Methanococcus</i>       | 10 | + | - | - | - | (Oren, 2014d)            |
|     | <i>Methanothermobacter</i> | 8  | + | - | - | - | (Oren, 2014c)            |
| 175 | <i>Methanosarcina</i>      | 22 | - | + | - | - | (Oren, 2014a)            |
|     | <i>Methanocaldococcus</i>  | 9  | + | - | - | - | (Oren, 2014b)            |
|     | <i>Methanococcus</i>       | 8  | + | - | - | - | (Oren, 2014d)            |
|     | <i>Methanothermobacter</i> | 7  | + | - | - | - | (Oren, 2014c)            |
|     | <i>Methanobrevibacter</i>  | 7  | + | - | - | - | (Oren, 2014c)            |
| 220 | <i>Methanosarcina</i>      | 25 | - | + | - | - | (Oren, 2014a)            |
|     | <i>Methanocaldococcus</i>  | 10 | + | - | - | - | (Oren, 2014b)            |
|     | <i>Methanothermobacter</i> | 8  | + | - | - | - | (Oren, 2014c)            |
|     | <i>Methanococcus</i>       | 7  | + | - | - | - | (Oren, 2014d)            |
| 250 | <i>Methanosarcina</i>      | 15 | - | + | - | - | (Oren, 2014a)            |
|     | <i>Methanocaldococcus</i>  | 14 | + | - | - | - | (Oren, 2014b)            |
|     | <i>Methanothermobacter</i> | 10 | + | - | - | - | (Oren, 2014c)            |
|     | <i>Methanococcus</i>       | 9  | + | - | - | - | (Oren, 2014d)            |
|     | <i>Methanosaeta</i>        | 6  | - | - | + | - | (Patel and Sprott, 1990) |
| 265 | <i>Methanosarcina</i>      | 15 | - | + | - | - | (Oren, 2014a)            |
|     | <i>Methanocaldococcus</i>  | 14 | + | - | - | - | (Oren, 2014b)            |
|     | <i>Methanothermobacter</i> | 11 | + | - | - | - | (Oren, 2014c)            |
|     | <i>Methanococcus</i>       | 8  | + | - | - | - | (Oren, 2014d)            |
|     | <i>Methanopyrus</i>        | 6  | + | - | - | - | (Oren, 2014f)            |
| 275 | <i>Methanosarcina</i>      | 19 | - | + | - | - | (Oren, 2014a)            |
|     | <i>Methanocaldococcus</i>  | 12 | + | - | - | - | (Oren, 2014b)            |
|     | <i>Methanothermobacter</i> | 9  | + | - | - | - | (Oren, 2014c)            |
|     | <i>Methanococcus</i>       | 8  | + | - | - | - | (Oren, 2014d)            |
|     | <i>Methanococcoides</i>    | 5  | - | + | - | - | (Oren, 2014a)            |

## References used in the Supplementary Tables

- An, T. T., and Picardal, F. W.: *Desulfuromonas carbonis* sp. nov., an Fe (III)-, S<sup>0</sup>- and Mn (IV)-reducing bacterium isolated from an active coalbed methane gas well. *Int. J. Syst. Evol. Microbiol.*, 65, 1686-1693, 2015.
- Brysch, K., Schneider, C., Fuchs, G., and Widdel, F.: Lithoautotrophic growth of sulfate-reducing bacteria, and description of *Desulfobacterium autotrophicum* gen. nov., sp. nov. *Arch. Microbiol.*, 148, 264-274, 1987.
- Burggraf, S., Jannasch, H. W., Nicolaus, B., and Stetter, K. O.: *Archaeoglobus profundus* sp. nov., represents a new species within the sulfate-reducing Archaeobacteria. *Syst. Appl. Microbiol.*, 13, 24-28, 1990.
- Cravo-Laureau, C., Matheron, R., Cayol, J. L., Joulain, C., and Hirschler-Rea, A.: *Desulfatibacillum aliphaticivorans* gen. nov., sp. nov., an n-alkane- and n-alkene-degrading, sulfate-reducing bacterium. *Int. J. Syst. Evol. Microbiol.*, 54, 77-83, 2004.
- Hagenauer, A., Hippe, H., and Rainey, F. A.: *Desulfotomaculum aeronauticum* sp. nov., a sporeforming, thiosulfate-reducing bacterium from corroded aluminium alloy in an aircraft. *Syst. Appl. Microbiol.*, 20, 65-71, 1997.
- Knoblauch, C., Sahm, K., and Jørgensen, B. B.: Psychrophilic sulfate-reducing bacteria isolated from permanently cold Arctic marine sediments: description of *Desulfofrigus oceanense* gen. nov., sp. nov., *Desulfofrigus fragile* sp. nov., *Desulfofaba gelida* gen. nov., sp. nov., *Desulfotalea psychrophila* gen. nov., sp. nov. and *Desulfotalea arctica* sp. nov. *Int. J. Syst. Evol. Microbiol.*, 49, 1631-1643, 1999.
- Love, C. A., Patel, B. K. C., Nichols, P. D., and Stackebrandt, E.: *Desulfotomaculum australicum*, sp. nov., a thermophilic sulfate-reducing bacterium isolated from the Great Artesian Basin of Australia. *Syst. Appl. Microbiol.*, 16, 244-251, 1993.
- Motamedi, M., and Pedersen, K.: *Desulfovibrio aespoensis* sp. nov., a mesophilic sulfate-reducing bacterium from deep groundwater at Aspö hard rock laboratory, Sweden. *Int. J. Syst. Bacteriol.*, 48, 311-315, 1998.
- Ollivier, B., Hatchikian, C. E., Prensier, G., Guezennec, J., and Garcia, J. L.: *Desulfohalobium retbaense* gen. nov., sp. nov., a halophilic sulfate-reducing bacterium from sediments of a hypersaline lake in Senegal. *Int. J. Syst. Evol. Microbiol.*, 41, 74-81, 1991.
- Oren, A.: The family *Methanosarcinaceae*, in: *The Prokaryotes*, edited by: Rosenberg, E., DeLong, E. F., Lory, S., Stackebrandt, E., and Thompson, F., Springer, Heidelberg, Germany, 259-281, 2014a.
- Oren, A.: The family *Methanocaldococcaceae*, in: *The Prokaryotes*, edited by: Rosenberg, E., DeLong, E. F., Lory, S., Stackebrandt, E., and Thompson, F., Springer, Heidelberg, Germany, 201-208, 2014b.
- Oren, A.: The family *Methanobacteriaceae*, in: *The Prokaryotes*, edited by: Rosenberg, E., DeLong, E. F., Lory, S., Stackebrandt, E., and Thompson, F., Springer, Heidelberg, Germany, 165-193, 2014c.
- Oren, A.: The family *Methanococcaceae*, in: *The Prokaryotes*, edited by: Rosenberg, E., DeLong, E. F., Lory, S., Stackebrandt, E., and Thompson, F., Springer, Heidelberg, Germany, 215-224, 2014d.
- Oren, A.: The family *Methanospirillaceae*. In: Rosenberg E, DeLong EF, Lory S, Stackebrandt E, Thompson F (eds.). *The Prokaryotes*. Heidelberg: Springer, 2014e, 283-290.
- Oren, A.: The Family *Methanopyraceae*, in: *The Prokaryotes*, edited by: Rosenberg, E., DeLong, E. F., Lory, S., Stackebrandt, E., and Thompson, F., Springer, Heidelberg, Germany, 247-252, 2014f.
- Patel, G. B., and Sprott, G. D.: *Methanosaeta concilii* gen. nov., sp. nov. ("*Methanothrix concilii*") and *Methanosaeta thermoacetophila* nom. rev., comb. nov. *Int. J. Syst. Evol. Microbiol.*, 40, 79-82, 1990.
- Platen, H., Temmes, A. and Schink, B.: Anaerobic degradation of acetone by *Desulfococcus biacutus* spec. nov. *Arch. Microbiol.*, 154, 355-361, 1990.
- Sorokin, D. Y., Foti, M., Tindall, B. J., and Muyzer, G.: *Desulfurispirillum alkaliphilum* gen. nov. sp. nov., a novel obligately anaerobic sulfur- and dissimilatory nitrate-reducing bacterium from a full-scale sulfide-removing bioreactor. *Extremophiles*, 11, 363-70, 2007.
- Sorokin, D. Y., Tourova, T. P., Mußmann, M., and Muyzer, G.: *Dethiobacter alkaliphilus* gen. nov. sp. nov., and *Desulfurivibrio alkaliphilus* gen. nov. sp. nov.: two novel representatives of reductive sulfur cycle from soda lakes. *Extremophiles*, 12, 431-439, 2008.

Sorokin, D. Y., Tourova, T. P., Panteleeva, A. N., and Muyzer, G.: *Desulfonatronobacter acidivorans* gen. nov., sp. nov. and *Desulfobulbus alkaliphilus* sp. nov., haloalkaliphilic heterotrophic sulfate-reducing bacteria from soda lakes. Int. J. Syst. Evol. Microbiol., 62, 2107-2113, 2012.

Suzuki, D., Ueki, A., Amaishi, A., and Ueki, K.: *Desulfobulbus japonicus* sp. nov., a novel gram-negative propionate-oxidizing, sulfate-reducing bacterium isolated from an estuarine sediment in Japan. Int. J. Syst. Evol. Microbiol., 57, 849-855, 2007.

Thevenieau, F., Fardeau, M. L., Ollivier, B., Joulain, C., and Baena, S.: *Desulfomicrobium thermophilum* sp. nov., a novel thermophilic sulphate-reducing bacterium isolated from a terrestrial hot spring in Colombia. Extremophiles, 11, 295-303, 2007.

Utkin, I., Woese, C., and Wiegel, J.: Isolation and characterization of *Desulfitobacterium dehalogenans* gen. nov., sp. nov., an anaerobic bacterium which reductively dechlorinates chlorophenolic compounds. Int. J. Syst. Evol. Microbiol., 44, 612-619, 1994.

### Supplementary Note 1

Following are the bacterial and archaeal taxa, summing up the mean relative abundances of which gave the measure of prevalence of sulfate-reducers within a sediment community of SSK42/5, SSK42/6 or SSK42/9 (references are cited after the names of the taxa).

1. *Archaeoglobus*, *Desulfurobacterium*, *Desulfacinum*, *Desulfobacca*, *Desulfomonile*, *Desulforhabdus*, *Desulfovibrio*, *Desulfurella*, *Desulfuromonas*, *Desulfuromusa* and *Thermodesulforhabdus*, *Desulfitobacterium*, *Desulfosporosinus*, *Desulfotomaculum*, *Thermodesulfovibrio*, *Dethiosulfovibrio*, *Thermodesulfobacterium* (Rabus et al., 2006, 2013);
2. *Desulfurococcus* (Kublanov et al., 2009);
3. *Desulfurolobus* (Zillig et al., 1986);
4. *Desulfurispira* (Sorokin and Muyzer, 2010);
5. *Desulfurispirillum* (Sorokin et al., 2007);
6. *Desulfobaculum* (Zhao et al., 2012);
7. *Desulfocurvus* (Klouche et al., 2009);
8. *Desulfoglaeba* (Davidova et al., 2006);
9. *Desulfomonas* (Moore et al., 1976);
10. *Desulfosoma* (Baena et al., 2011);
11. *Desulfovira* (Tanaka et al., 2000);
12. *Desulfitibacter* (Nielsen et al., 2006);
13. *Desulfitispora* (Sorokin and Chernyh, 2017);
14. *Desulfonispora* (Denger et al., 1999);
15. *Desulfurispora* (Kaksonen et al., 2007a);
16. *Desulfoviregula* (Kaksonen et al., 2007a);
17. *Dethiobacter* (Sorokin et al., 2008);
18. *Dethiosulfatibacter* (Takii et al., 2007);
19. *Thermodesulfobium* (Frolov et al., 2017);
20. *Thermodesulfatator* (Lai et al., 2016);
21. *Desulfarculaceae* (Kuever, 2014a);
22. *Desulfobacteraceae* (Kuever, 2014b);
23. *Desulfobulbaceae* (Kuever, 2014c);
24. *Desulfohalobiaceae* (Kuever, 2014d);
25. *Desulfomicrobiaceae* (Kuever and Galushko, 2014);
26. *Desulfonatronaceae* (Kuever, 2014e).

### References

1. Rabus, R., Hansen, T. A., and Widdel, F.: Dissimilatory sulfate- and sulfur-reducing prokaryotes, in: The Prokaryotes, volume Ecophysiology and Biochemistry, edited by M. Dworkin, S. Falkow, E. Rosenberg, K. -H. Schleifer and E. Stackebrandt, Springer, New York, USA, 659-768, 2006.

2. Rabus, R., Hansen, T. A., and Widdel, F.: Dissimilatory sulfate- and sulfur-reducing prokaryotes, in: *The Prokaryotes*, volume Prokaryotic Physiology and Biochemistry, edited by E. Rosenberg, E. F. DeLong, S. Lory, E. Stackebrandt and F. Thompson, Springer, Berlin, Germany, 309-404, 2013.
3. Kublanov, I. V., Bidjjeva, S. K., Mardanov, A. V., and Bonch-Osmolovskaya, E. A.: *Desulfurococcus kamchatkensis* sp. nov., a novel hyperthermophilic protein-degrading archaeon isolated from a Kamchatka hot spring. *Int. J. Syst. Evol. Microbiol.*, 59, 1743-1747, 2009.
4. Zillig, W., Yeats, S., Holz, I., Böck, A., Rettenberger, M., Gropp, F., and Simon, G.: *Desulfurolobus ambivalens*, gen. nov., sp. nov., an autotrophic archaeobacterium facultatively oxidizing or reducing sulfur. *Syst. Appl. Microbiol.*, 8, 197-203, 1986.
5. Sorokin, D. Y., and Muyzer, G.: *Desulfurispira natronophila* gen. nov. sp. nov.: an obligately anaerobic dissimilatory sulfur-reducing bacterium from soda lakes. *Extremophiles*, 14, 349-355, 2010.
6. Sorokin, D. Y., Foti, M., Tindall, B. J., and Muyzer, G.: *Desulfurispirillum alkaliphilum* gen. nov. sp. nov., a novel obligately anaerobic sulfur- and dissimilatory nitrate-reducing bacterium from a full-scale sulfide-removing bioreactor. *Extremophiles*, 11, 363-370, 2007.
7. Zhao, C., Gao, Z., Qin, Q., Li, F., and Ruan, L.: *Desulfobaculum xiamenensis* gen. nov., sp. nov., a member of the family *Desulfovibrionaceae* isolated from marine mangrove sediment. *Int. J. Syst. Evol. Microbiol.*, 62, 1570-1575, 2012.
8. Klouche, N., Basso, O., Lascourreges, J. F., Cayol, J. L., Thomas, P., Fauque, G., Fardeau, M. L., and Magot, M.: *Desulfocurvus vexinensis* gen. nov., sp. nov., a sulfate-reducing bacterium isolated from a deep subsurface aquifer. *Int. J. Syst. Evol. Microbiol.*, 59, 3100-3104, 2009.
9. Davidova, I. A., Duncan, K. E., Choi, O. K., and Suflita, J. M.: *Desulfoglaeba alkanexedens* gen. nov., sp. nov., an n-alkane-degrading, sulfate-reducing bacterium. *Int. J. Syst. Evol. Microbiol.*, 56, 2737-2742, 2006.
10. Moore, W. C., Johnson, J. L., and Holdeman, L. V.: Emendation of *Bacteroidaceae* and *Butyrivibrio* and descriptions of *Desulfomonas* gen. nov. and ten new species in the genera *Desulfomonas*, *Butyrivibrio*, *Eubacterium*, *Clostridium*, and *Ruminococcus*. *Int. J. Syst. Evol. Microbiol.*, 26, 238-252, 1976.
11. Baena, S., Perdomo, N., Carvajal, C., Díaz, C., and Patel, B. K.: *Desulfosoma caldarium* gen. nov., sp. nov., a thermophilic sulfate-reducing bacterium from a terrestrial hot spring. *Int. J. Syst. Evol. Microbiol.*, 61, 732-736, 2011.
12. Tanaka, K., Stackebrandt, E., Tohyama, S., and Eguchi, T.: *Desulfovirga adipica* gen. nov., sp. nov., an adipate-degrading, gram-negative, sulfate-reducing bacterium. *Int. J. Syst. Evol. Microbiol.*, 50, 639-644, 2000.
13. Nielsen, M. B., Kjeldsen, K. U., and Ingvorsen, K.: *Desulfitibacter alkalitolerans* gen. nov., sp. nov., an anaerobic, alkalitolerant, sulfite-reducing bacterium isolated from a district heating plant. *Int. J. Syst. Evol. Microbiol.*, 56, 2831-2836, 2006.
14. Sorokin, D. Y., and Chernykh, N. A.: *Desulfonatronospira sulfatiphila* sp. nov., and *Desulfitispora elongata* sp. nov., two novel haloalkaliphilic sulfidogenic bacteria from soda lakes. *Int. J. Syst. Evol. Microbiol.*, 67, 396-401, 2017.
15. Denger, K., Stackebrandt, E., and Cook, A. M.: *Desulfonispora thiosulfatigenes* gen. nov., sp. nov., a taurine-fermenting, thiosulfate-producing anaerobic bacterium. *Int. J. Syst. Evol. Microbiol.*, 49, 1599-1603, 1999.
16. Kaksonen, A. H., Spring, S., Schumann, P., Kroppenstedt, R. M., and Puhakka, J. A.: *Desulfurispora thermophila* gen. nov., sp. nov., a thermophilic, spore-forming sulfate-reducer isolated from a sulfidogenic fluidized-bed reactor. *Int. J. Syst. Evol. Microbiol.*, 57, 1089-1094, 2007a.

17. Kaksonen, A. H., Spring, S., Schumann, P., Kroppenstedt, R. M., and Puhakka, J. A.: *Desulfoviregula thermocuniculi* gen. nov., sp. nov., a thermophilic sulfate-reducer isolated from a geothermal underground mine in Japan. *Int. J. Syst. Evol. Microbiol.*, 57, 98-102, 2007b.
18. Sorokin, D. Y., Tourova, T. P., Mußmann, M., and Muyzer, G.: *Dethiobacter alkaliphilus* gen. nov. sp. nov., and *Desulfurivibrio alkaliphilus* gen. nov. sp. nov.: two novel representatives of reductive sulfur cycle from soda lakes. *Extremophiles*, 12, 431-439, 2008.
19. Takii, S., Hanada, S., Tamaki, H., Ueno, Y., Sekiguchi, Y., Ibe, A., and Matsuura, K.: *Dethiosulfatibacter aminovorans* gen. nov., sp. nov., a novel thiosulfate-reducing bacterium isolated from coastal marine sediment via sulfate-reducing enrichment with Casamino acids. *Int. J. Syst. Evol. Microbiol.*, 57, 2320-2326, 2007.
20. Frolov, E. N., Kublanov, I. V., Toshchakov, S. V., Samarov, N. I., Novikov, A. A., Lebedinsky, A. V., Bonch-Osmolovskaya, E. A., and Chernyh, N. A.: *Thermodesulfobium acidiphilum* sp. nov., a thermoacidophilic, sulfate-reducing, chemoautotrophic bacterium from a thermal site. *Int. J. Syst. Evol. Microbiol.*, 67, 1482-1485, 2017.
21. Lai, Q., Cao, J., Dupont, S., Shao, Z., Jebbar, M., and Alain, K.: *Thermodesulfatator autotrophicus* sp. nov., a thermophilic sulfate-reducing bacterium from the Indian Ocean. *Int. J. Syst. Evol. Microbiol.*, 66, 3978-3982, 2016.
22. Kuever, J.: The family Desulfarculaceae, in: *The Procaryotes*, edited by: Rosenberg, E., DeLong, E. F., Lory, S., Stackebrandt, E., and Thompson, F., Springer, Heidelberg, Germany, 41–44, 2014a.
23. Kuever, J.: The family Desulfobacteraceae, in: *The Procaryotes*, edited by: Rosenberg, E., DeLong, E. F., Lory, S., Stackebrandt, E., and Thompson, F., Springer, Heidelberg, Germany, 45-73, 2014b.
24. Kuever, J.: The family Desulfobulbaceae, in: *The Procaryotes*, edited by: Rosenberg, E., DeLong, E. F., Lory, S., Stackebrandt, E., and Thompson, F., Springer, Heidelberg, Germany, 75-86, 2014c.
25. Kuever, J.: The family Desulfohalobiaceae, in: *The Procaryotes*, edited by: Rosenberg, E., DeLong, E. F., Lory, S., Stackebrandt, E., and Thompson, F., Springer, Heidelberg, Germany, 87-95, 2014d.
26. Kuever, J., and Galushko, A.: The Family Desulfomicrobiaceae, in: *The Procaryotes*, edited by: Rosenberg, E., DeLong, E. F., Lory, S., Stackebrandt, E., and Thompson, F., Springer, Heidelberg, Germany, 97-102, 2014,
27. Kuever, J. The family Desulfonatronaceae, in: *The Procaryotes*, edited by: Rosenberg, E., DeLong, E. F., Lory, S., Stackebrandt, E., and Thompson, F., Springer, Heidelberg, Germany, 103-106, 2014e.

## Supplementary Note 2

Following are the taxa, summing up the mean relative abundances of which gave the measure of prevalence of anaerobically sulfur-oxidizing chemolithotrophic bacteria (ANSOB) within a sediment community of SSK42/5, SSK42/6 or SSK42/9 (references are cited after the names of the taxa).

1. *Beggiatoa* (Dubinina et al., 2017);
2. *Sulfuricurvum* (Kodama et al., 2004);
3. *Sulfurimonas* (Labrenz et al., 2013);
4. *Sulfurovum* (Mori et al., 2018);
5. *Thiobacillus* (Kellermann et al., 2009).
6. *Thioploca* (Maier and Gallardo, 1984)
7. *Thiomargarita* (Schulz et al., 1999)

## References

1. Dubinina, G., Savvichev, A., Orlova, M., Gavrish, E., Verbarq, S., and Grabovich, M.: *Beggiatoa leptomitiformis* sp. nov., the first freshwater member of the genus capable of chemolithoautotrophic growth. *Int. J. Syst. Evol. Microbiol.*, 67, 197-204, 2017.
2. Kodama, Y., and Watanabe, K.: *Sulfuricurvum kujiense* gen. nov., sp. nov., a facultatively anaerobic, chemolithoautotrophic, sulfur-oxidizing bacterium isolated from an underground crude-oil storage cavity. *Int. J. Syst. Evol. Microbiol.*, 54, 2297-2300, 2004.
3. Labrenz, M., Grote, J., Mammitzsch, K., Boschker, H. T., Laue, M., Jost, G., Glaubitz, S., and Jürgens, K.: *Sulfurimonas gotlandica* sp. nov., a chemoautotrophic and psychrotolerant epsilonproteobacterium isolated from a pelagic redoxcline, and an emended description of the genus *Sulfurimonas*. *Int. J. Syst. Evol. Microbiol.*, 63, 4141-4148, 2013.
4. Mori, K., Yamaguchi, K., and Hanada, S.: *Sulfurovum denitrificans* sp. nov., an obligately chemolithoautotrophic sulfur-oxidizing epsilonproteobacterium isolated from a hydrothermal field. *Int. J. Syst. Evol. Microbiol.*, 68, 2183-2187, 2018.
5. Kellermann, C., and Griebler, C.: *Thiobacillus thiophilus* sp. nov., a chemolithoautotrophic, thiosulfate-oxidizing bacterium isolated from contaminated aquifer sediments. *Int. J. Syst. Evol. Microbiol.*, 59, 583-588, 2009.
6. Maier, S., and Gallardo, V. A.: *Thioploca araucae* sp. nov. and *Thioploca chileae* sp. nov. *Int. J. Syst. Evol. Microbiol.*, 34, 414-418, 1984.
7. Schulz, H. N., Brinkhoff, T., Ferdelman, T. G., Mariné, M. H., Teske, A., and Jørgensen, B. B.: Dense populations of a giant sulfur bacterium in Namibian shelf sediments. *Science*, 284, 493-495, 1999.

### Supplementary Note 3

Distributions (fluctuations) of the mean relative abundances of individual metabolic-types along a sediment core were fitted to potential (approximate) mathematical functions using OriginPro 9. For this purpose  $\chi^2$  values were considered as minimization criteria.  $\chi^2$  minimization was achieved by following Levenberg Marquardt Algorithm. For optimal fitting of the *ad hoc* functions to the distribution of the data, the functions were independently iterated up to 4000 times with uniformly sampled parameters considering a tolerance level at  $10^{-9}$ . The goodness of all function fittings was reflected in the corresponding minimized  $\chi^2$  values.

To predict/forecast a trend/feature from any time series data, two quantitative methods are popular across diverse scientific disciplines: one is parametric model fitting, while the other one is non-parametric data modeling. In this study, we opted for the first method to track the fluctuations of each dataset and fitted segmented parametric model for each of them simultaneously using the equations.

$$(y = y_0 + A_1 e^{-\frac{x}{t_1}})$$

Equation 1

$$(y = y_0 + A_1 e^{\frac{x}{t_1}})$$

Equation 2

$$(y = y_0 + \frac{A}{w\sqrt{\pi/2}} e^{-2\frac{(x-x_c)^2}{w^2}})$$

Equation 3

Equation 1 is a standard mathematical form of a process involving exponential decrease/decline (for example, radioactive decay) where a variable ( $y$ ) reduces from its initial amount ( $A_1$ ) by a constant rate ( $1/t_1$ ) over time. In the present case, sediment-depth ( $x$ ) is the representative measure of the time-scale, while  $t_1$  is considered to be the “half-life” of the variable  $y$ . On the contrary, Equation 2 represents a process involving exponential increase (for example, the number of cells doubling in a microbial culture). In the present case, the variable  $y$  increases from its initial amount ( $A_1$ ) by a constant rate ( $1/t_1$ ) over time, and  $t_1$  is considered as the “doubling time” of the variable  $y$ . Equation 3 represents a bell-shaped curve or a Gaussian function, which involves the features of a normal distribution of frequencies/counts ( $y$ ) of a variable ( $x$ ). The typical feature of a normal distribution entails that the frequency/count for the variable  $y$  is maximal at the central value of  $x$  and decreases on either side. In all the three equations,  $y_0$  is a scaling factor that aligns the curves with the data.

Zones of exponential decline, exponential increase, and Gaussian distribution - defined by Equations 1, 2 and 3 respectively - were identified for the individual metabolic-types explored along the three sediment cores. The parameters used in these equations, namely  $y_0$ ,  $A$ ,  $A_1$ ,  $t_1$ ,  $w$ ,  $x_c$ , were estimated simultaneously from the data fitting by  $\chi^2$  minimization ( $\chi^2$  value for each function fitted is given in the legend of Fig. S1). Furthermore, zones of discontinuous increase and decrease, not defined by any mathematical form, also appeared along the sediment-depths, and these could be reflective of drastic changes in the prevailing biogeochemical regime.

Along SSK42/5 and SSK42/6, relative abundances of sulfate-reducers, methanogens, acetogens and anaerobic methane-oxidizers decline from the sediment-surfaces to the core-bottoms via multiple phases of fall and rise. In SSK42/5 and SSK42/6, prevalence of all the four metabolic-types individually,

are at their respective core-wise maxima within 0-8 cmbsf; from there they decrease exponentially till the first 60-80 cmbsf. In SSK42/5, the upper exponential-decline zone is followed by a zone of exponential increase in the relative abundances of all four metabolic-types; then there are discontinuous reductions in their relative abundances, and finally Gaussian (bell-shaped) distributions (Figs. 4A and S1). Along SSK42/6, the first exponential-decline zone is followed by three consecutive zones of discontinuous increase and decrease in the relative abundances of all four metabolic-types; however, within this territory, only one exponential-decline zone conform to a mathematical function (Figs. 4B and S1). In contrast to the above trends, over the first 120 cmbsf of SSK42/9, the trend of fluctuation in the relative abundance of sulfate-reducers is different from that of methanogens, ANME, and acetogens (Figs. 4C and S1). While the relative abundances of methanogens, ANME and acetogens exhibit sharp exponential increases along this sediment-depth, prevalence of sulfate-reducers has two fluctuation features: an initial weak exponential-decline zone overlapped by a subsequent zone of weak exponential increase that brings the relative abundance of sulfate-reducers almost to the core-top level. Below 120 cmbsf of SSK42/9, relative abundances of all four metabolic-types plateau.

Considerable prevalence of ANSOB was detected in all the three cores. In the two pOMZ cores SSK42/5 (Figs. 4D and S1) and SSK42/6 (Figs. 4E and S1), their mean relative abundance in the different sedimentary communities ranges between 0.4-4.6% and 0.3-2.5% of the metagenomic reads annotated respectively; minimum prevalence is encountered within 0-2 cmbsf, while prevalence increases exponentially till 140 and 220 cmbsf in SSK42/5 and SSK42/6 respectively. In SSK42/5, the upper zone of exponential increase is followed by a zone of discontinuous reduction in ANSOB-prevalence, and then a Gaussian distribution (Figs. 4D and S1); in SSK42/6, however, the upper zone of exponential increase is followed by a single zone of sharp exponential decline (Figs. 4E and S1). On the other hand, overall prevalence, and population distribution (involving a single sharp exponential-decline zone), of ANSOB along the sOMZ core SSK42/9 (Figs. 4F and S1) are distinct from SSK42/5 or SSK42/6. ANSOB constitute only 0.4-0.8 % of the communities explored along SSK42/9, except at 0 cmbsf where their prevalence is 1.8%.

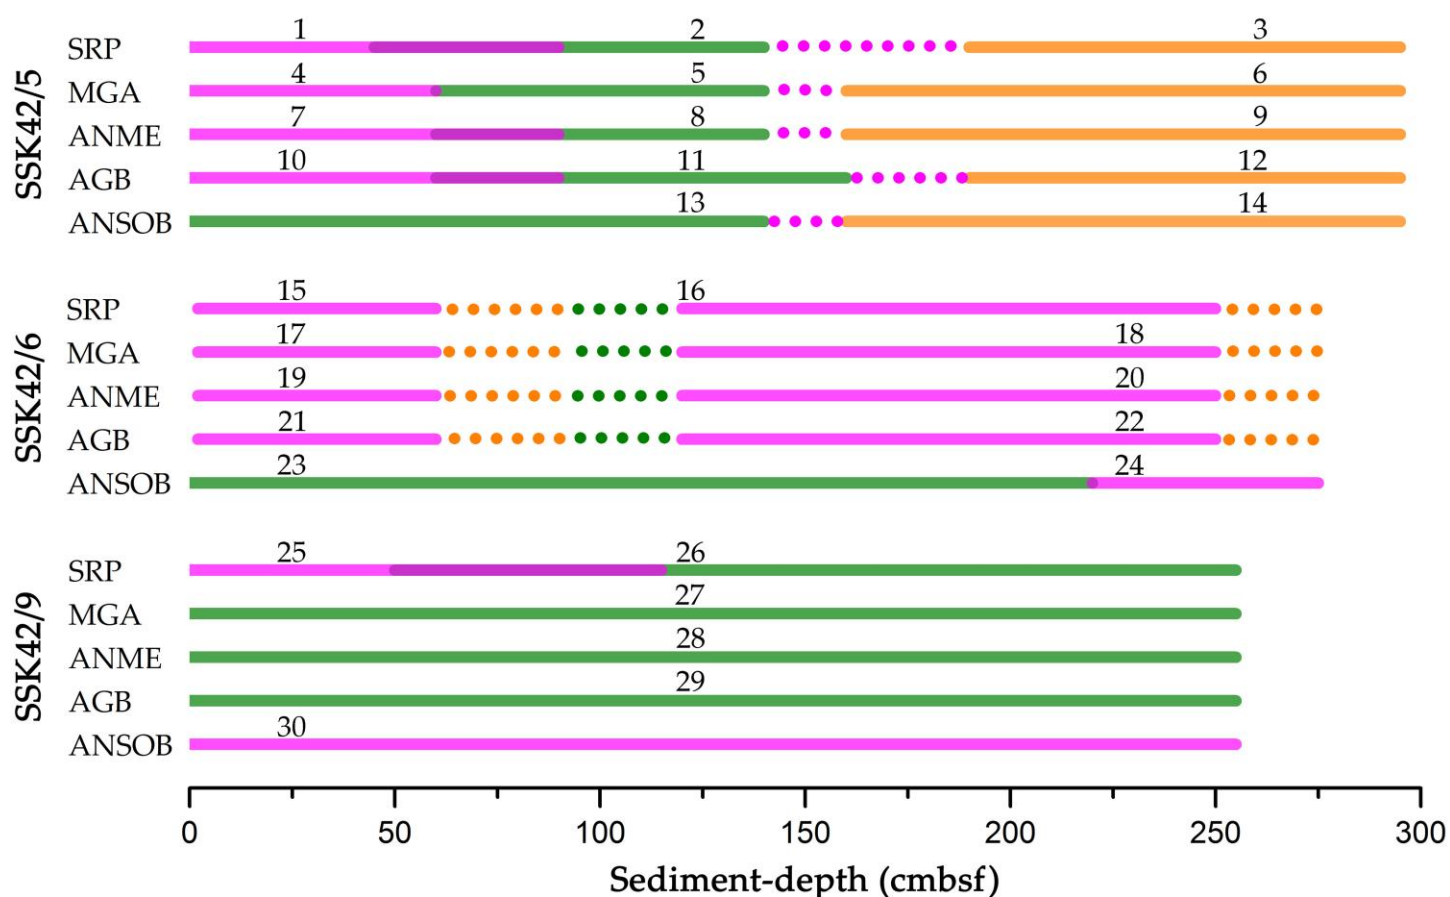

**Fig. S1.** Schematic alignment of the different population distribution zones defined by mathematical functions, or identified as discontinuous trends, for the relative abundances of sulfate-reducing bacteria and archaea, i.e. prokaryotes (SRP), methanogenic archaea (MGA), anaerobically methane-oxidizing archaea (ANME), acetogenic bacteria (AGB) and anaerobically sulfur-oxidizing bacterial chemolithotrophs (ANSOB), along SSK42/5, SSK42/6 and SSK42/9. The solid lines in three different colors represent three different zones of function-fitted distribution: exponential decline (magenta), exponential increase (olive), and bell-shaped curve or Gaussian function (orange). The solid lines represent the expanses of the mathematically defined population distribution zones; the colored dotted lines represent spans having no mathematically defined distribution of the relevant populations, but, appear to follow the trends of the solid lines having the corresponding colors. The numbers over the solid lines demarcating the zones of functional distribution refer to their reduced  $\chi^2$  values; **1:** 0.0621, **2:** 0.0318, **3:** 57.9278, **4:** 0.0160, **5:** 0.0163, **6:** 0.0001, **7:** 0.0216, **8:** 0.0018, **9:** 0.0007, **10:** 0.0007, **11:** 0.0004, **12:** 28.85384, **13:** 0.2110, **14:** 0.8037, **15:** 0.0014, **16:** 0.0183, **17:** 0.0109, **18:** 0.0106, **19:** 0.0124, **20:** 0.0536, **21:** 0.0002, **22:** 0.0002, **23:** 0.1126, **24:** 0.0442, **25:** 0.5305, **26:** 0.1023, **27:** 0.3702, **28:** 0.2662, **29:** 0.0027, **30:** 0.0009.
