# Supplementary material for: Sedimentation rate and organic matter dynamics shape microbiomes across a continental margin
Source: Copernicus journal article supplement (doi:10.5194/bg-18-5203-2021), 2021-09-23
Supplement: Supplementary file 1 [file bg-18-5203-2021-supplement.zip › bg-18-5203-2021-supplement-title-page.pdf]

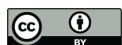

*Supplement of*

## **Sedimentation rate and organic matter dynamics shape microbiomes across a continental margin**

**Sabyasachi Bhattacharya et al.**

*Correspondence to:* Wriddhiman Ghosh ([wriman@jcbose.ac.in](mailto:wriman@jcbose.ac.in)) and Aninda Mazumdar ([maninda@nio.org](mailto:maninda@nio.org))

- [bg-18-5203-2021-supplement-title-page.pdf](#)
- [1\\_Supplementary\\_Information.pdf](#)
- [2\\_Supplementary\\_Dataset.xls](#)

The copyright of individual parts of the supplement might differ from the article licence.
